# Supplementary material for: Expression Profile Analysis of Selenium-Related Genes in Peripheral Blood Mononuclear Cells of Patients with Keshan Disease
Source: Biomed Res Int. 2019 Nov 17;2019:4352905. doi: 10.1155/2019/4352905 (PMC6885826; doi:10.1155/2019/4352905)
Supplement: Supplementary Materials — Selenium related genes in gene expression microarray data from Keshan Disease patients and healthy controls. [file 4352905.f1.xlsx]

## Sheet: Sheet1
	DZ1	DZ2	DZ3	DZ4	SY1	SY2	SY3	SY4
VPS39	0.0233969	0.0227608	0.046413	0.0430277	0.0254366	0.0211805	0.0199764	0.0179134
GULP1	0.062483	0.00140184	0.001234	0.00197669	1.46105	0.00359972	0.00180043	0.00241511
ATMIN	0.0177871	0.0167792	0.0341835	0.0313487	0.0228498	0.0205698	0.0231902	0.0204085
MMP15	0.00402719	0.00145706	0.001234	0.0015917	0.00190176	0.00443537	0.00613535	0.00454232
DECR2	0.084831	0.0791413	0.140344	0.144935	0.10874	0.0710302	0.0996995	0.0930856
PPP4C	0.542736	0.481597	0.73303	0.708501	0.550887	0.404968	0.551451	0.537401
VKORC1	0.551857	0.490799	0.814069	0.841143	0.541306	0.33426	0.471107	0.40625
SERPINF1	0.0761654	0.103375	0.165761	0.145582	0.107303	0.0797081	0.125629	0.112278
SMURF2	0.0133175	0.0164111	0.0187125	0.0149465	0.0213169	0.0143667	0.0120516	0.0125074
STAT3	0.0925843	0.0871168	0.156183	0.134906	0.105387	0.0819579	0.0902043	0.0834891
SUZ12	1.54611	1.46013	1.08297	0.973784	1.56643	1.45596	1.51923	1.51944
EML2	0.0226216	0.0267179	0.0231697	0.0151406	0.0152811	0.02703	0.0419979	0.0358268
ACTN4	0.184713	0.156135	0.308683	0.2944	0.170056	0.131133	0.212546	0.206324
HPN	0.0333395	0.0368099	0.0372041	0.040116	0.0414842	0.0485319	0.0577015	0.0553395
LPAR2	0.237162	0.211657	0.176075	0.136524	0.168619	0.18095	0.249066	0.29621
FBXO17	0.0027228	0.00142025	0.00198544	0.00148818	0.00185385	0.00224661	0.00441891	0.00200886
ARL5A	0.716046	0.647241	0.93931	0.99643	0.790403	0.658877	0.821699	0.700541
CXCR4	21.3446	14.0184	8.65639	7.79674	12.9818	16.038	17.0548	16.7618
TUBA4A	0.953208	0.791413	0.593055	0.482039	0.881419	0.642807	0.598927	0.467027
MALL	0.000898478	0.00579756	0.00209227	0.00159817	0.00182511	0.00498175	0.00241762	0.00224557
SMOX	1.18581	1.52454	3.26733	3.06046	1.61913	4.98175	1.63975	1.85212
NFS1	0.241723	0.236504	0.337415	0.321252	0.310892	0.182879	0.206338	0.197047
DGCR14	0.0779897	0.0837426	0.169076	0.173405	0.100597	0.05496	0.0617187	0.0767716
TXNRD2	0.0432364	0.0128835	0.0165761	0.0160788	0.0565258	0.0128883	0.00993343	0.00818897
ACO2	2.30777	2.27301	2.84372	3.1284	2.31372	2.14697	1.95017	2.03765
FAAH	0.00925843	0.00892641	0.01234	0.00850848	0.00828725	0.0113134	0.0137315	0.00959645
NES	0.0501688	0.0276074	0.0136292	0.0146229	0.00982016	0.0562456	0.0785179	0.0665354
OVGP1	0.0105811	0.0149694	0.017939	0.0137171	0.0100597	0.0176129	0.016507	0.0113878
UBAP2L	0.0716046	0.0736199	0.131135	0.118407	0.0799983	0.0803509	0.107003	0.0876476
ZMYM4	0.135456	0.144479	0.134082	0.126495	0.195445	0.144953	0.144984	0.133711
DNAJC9	0.866553	0.883438	0.607789	0.579094	0.847887	0.7328	0.876479	0.75812
OSBPL1A	0.0925843	0.0960126	0.097983	0.0892905	0.13365	0.0710302	0.0978735	0.0930856
ALOX5	9.34965	8.15953	11.5664	10.2231	9.82016	7.23158	6.93879	8.3809
FAM53B	0.144121	0.0812886	0.0766183	0.0760263	0.0498193	0.140132	0.250527	0.237032
CDK2AP2	0.170118	0.19724	0.61884	0.637327	0.247181	0.162309	0.21072	0.210162
RELA	0.217094	0.200614	0.261165	0.251049	0.215564	0.155559	0.189539	0.177854
ILK	0.647634	0.674849	1.63182	1.63376	0.723338	0.713516	0.719443	0.59498
CAT	2.14814	2.16872	2.07753	2.55578	2.26582	2.18233	2.07799	1.78494
TAS2R14	0.00711485	0.01	0.00839854	0.00553213	0.00799983	0.00803509	0.00701183	0.00905265
MVK	0.193378	0.17178	0.143659	0.122613	0.218439	0.122455	0.175296	0.122515
PWP1	0.148682	0.135583	0.135924	0.145582	0.133171	0.107992	0.147906	0.131471
TRPC4	0.0051081	0.00754603	0.00230223	0.00255254	0.00274006	0.0104135	0.00807091	0.00978838
ACTN1	2.7456	2.30676	3.61358	3.26752	2.7736	2.34946	2.15833	2.47269
NFKBIA	11.6757	11.0123	8.3617	7.05266	15.329	11.5384	12.8185	11.0359
DAD1	3.3157	2.91719	3.49571	3.26752	3.0179	3.14011	3.44383	2.83095
KTN1	2.11621	2.12577	1.7497	1.72434	1.96882	2.11483	2.42492	2.23597
FOS	1.07635	0.987733	1.3003	1.04496	1.21195	0.736014	0.898391	1.06521
OAZ2	1.89273	1.5	1.54342	1.28436	1.35087	2.63872	2.67326	2.91412
EMP2	0.0128615	0.0322087	0.00168708	0.00572624	0.00189218	0.0289263	0.0166166	0.0105561
CHMP1A	0.209341	0.188344	0.262639	0.255578	0.182511	0.143025	0.193556	0.177854
TBL3	0.00998816	0.0151534	0.036541	0.0381749	0.0163829	0.0113134	0.0101891	0.0122515
SIAH1	0.144121	0.17454	0.138502	0.137171	0.239516	0.102849	0.11869	0.115797
FUS	0.501688	0.435584	0.489915	0.482039	0.293647	0.376042	0.412675	0.444636
PPL	0.0193834	0.0222087	0.028474	0.0310899	0.0148021	0.0243945	0.0308594	0.0335876
CHST6	0.00560979	0.00450922	0.00504649	0.00462628	0.00217481	0.00662091	0.00755963	0.00562992
TNK1	0.00971451	0.0105215	0.00493598	0.00572624	0.00632322	0.0119562	0.0140237	0.0120595
KIF1C	1.42753	1.11043	1.08297	1.01261	0.962854	1.15705	1.31472	1.14838
TIMP2	5.74661	5.06136	7.14613	6.0174	6.17951	4.94961	4.67455	4.6063
PPP2R1A	0.211621	0.237117	0.201491	0.222579	0.18826	0.195735	0.238475	0.266781
ZNF324	0.15005	0.129755	0.155447	0.146553	0.138919	0.103492	0.11869	0.132751
ZNF586	0.14777	0.153988	0.176075	0.18311	0.172452	0.134347	0.154479	0.155463
ERCC1	0.220743	0.232823	0.493598	0.498215	0.305622	0.251016	0.257831	0.24471
VRK3	0.149594	0.13681	0.233907	0.227756	0.143231	0.119883	0.130741	0.115157
NOSIP	1.48682	1.33129	1.53237	1.42347	1.32213	1.11206	1.05177	1.18996
NDUFA7	1.29527	1.26381	1.68339	1.77287	1.88739	1.23419	1.14307	1.24434
ZNF571	0.0342972	0.0444787	0.0740398	0.0692325	0.0565258	0.0359972	0.0471107	0.0451033
FAM134A	9.076	7.51536	4.38345	4.10866	14.0835	10.5099	8.98391	8.6688
RALY	0.203412	0.2227	0.291739	0.275959	0.191134	0.197342	0.209625	0.210482
PCP4	0.0181976	0.0242025	0.0331521	0.0378514	0.0146584	0.0264836	0.0361182	0.0403051
THAP7	0.0174223	0.0269019	0.0383091	0.0410866	0.0259635	0.0153952	0.0187713	0.0175295
GSTT2	0.00488006	0.00665646	0.00438345	0.00365573	0.00502984	0.0113455	0.00975083	0.00687746
ADORA2A	0.377178	0.371167	0.344414	0.336457	0.305143	0.314011	0.359356	0.374262
ZBTB11	0.501688	0.398774	0.563586	0.527332	0.536516	0.488533	0.631795	0.617372
PSMD6	1.49594	1.30368	1.15296	0.99643	1.64308	1.2599	1.39506	1.12598
WDR19	0.00176959	0.00140798	0.00122663	0.00152376	0.00186343	0.00102528	0.00135124	0.00110999
CTSO	0.0290523	0.0432517	0.0611473	0.0698795	0.0453164	0.0257766	0.0215833	0.0232554
THOC2	0.0116757	0.0190185	0.0234275	0.0194433	0.0178679	0.015106	0.0134028	0.00940452
SCAMP1	0.0579222	0.0797548	0.068146	0.0679384	0.0675435	0.0568884	0.0460151	0.0479823
COX7C	8.30066	6.34971	9.50361	9.47903	7.28129	8.9993	9.64127	8.125
CNOT8	0.79358	0.739266	0.471497	0.50145	0.766451	0.617095	0.690227	0.604576
TERT	0.0253581	0.0312884	0.0103508	0.008832	0.0113531	0.029762	0.0297272	0.0228715
GSTA4	0.0465202	0.0306749	0.0104982	0.00918786	0.00541306	0.0507817	0.0712139	0.0604576
FOXF2	0.00384476	0.00478529	0.001234	0.00190551	0.00185864	0.00331046	0.00326123	0.00220079
YIPF3	1.55067	1.81289	3.50676	3.16399	2.95563	1.75486	1.54479	1.66658
VARS2	0.259966	0.293252	0.423611	0.407631	0.339155	0.195092	0.229711	0.219439
HSPA1A	18.5169	13.6503	9.98248	8.86435	19.1134	13.9489	14.3158	13.0192
PHACTR2	0.294172	0.265338	0.299843	0.297635	0.241911	0.363186	0.379808	0.275738
ARG1	0.501688	0.450922	0.523067	0.307988	0.871838	0.703874	1.06638	0.687746
BCLAF1	0.84831	0.782211	0.648308	0.614681	1.07782	0.826007	0.631795	0.732529
STYXL1	0.129071	0.152761	0.173496	0.179552	0.187302	0.122133	0.107369	0.1094
PJA1	0.428716	0.407977	0.379408	0.40116	0.512564	0.347116	0.3652	0.319882
AQP3	0.332027	0.263804	0.15913	0.127465	0.144668	0.261622	0.280473	0.277657
SCN9A	0.0073885	0.0125767	0.0082512	0.00766734	0.0120237	0.00472463	0.00708487	0.00502214
AR	0.0085287	0.0220553	0.0111612	0.0165317	0.0107303	0.0165844	0.00803439	0.008125
USP47	0.0112196	0.0152148	0.0175338	0.0140406	0.0152811	0.011442	0.00880131	0.0111959
PDGFA	0.447415	0.435584	0.208858	0.222903	0.378914	0.456393	0.372504	0.313164
BPTF	0.254493	0.249694	0.368357	0.352633	0.289814	0.276728	0.268056	0.281496
GPKOW	0.834627	0.812886	0.965095	0.886435	0.857467	0.835649	1.01525	0.985236
TBC1D8B	0.00752533	0.00849696	0.0105718	0.00947903	0.00819145	0.00861361	0.00602579	0.00457431
UBE2V1	0.757093	0.668714	1.19716	1.10643	0.570048	1.38525	1.0956	1.25394
ASAP3	0.00592905	0.0113191	0.0193019	0.021255	0.010874	0.0140132	0.00719443	0.00630167
H6PD	0.574661	0.736199	1.71286	2.27432	0.656274	0.790652	1.52653	2.19119
CYP4B1	0.000976012	0.00240185	0.00146238	0.00352633	0.00226103	0.00246838	0.000872827	0.00126993
CFH	0.173311	0.118405	0.0563586	0.0640562	0.149458	0.0620309	0.126724	0.0844488
PARP1	1.6875	1.57669	1.3224	1.2876	1.5856	1.22455	1.43889	1.13878
RHOU	0.0278209	0.0290798	0.0313472	0.0349398	0.025245	0.0327832	0.03652	0.0274459
HOOK1	0.00602026	0.00828223	0.0114927	0.00902611	0.00651484	0.010767	0.00379808	0.00508612
CRABP2	0.00761654	0.00631904	0.0139607	0.0114848	0.00756871	0.010992	0.0123437	0.0127313
RAB25	0.00114476	0.00143559	0.00315314	0.0023552	0.00264426	0.00363186	0.00181139	0.00326279
TOR3A	1.74223	1.94786	1.23768	1.22289	2.45264	1.95413	1.81869	1.47785
MDK	0.326097	0.417179	1.35187	1.76316	0.379393	0.475677	1.14673	1.6154
AMPD3	1.54155	1.06442	0.968779	1.01908	1.15447	1.01885	1.0116	1.10999
PLA2G16	1.55067	1.19019	0.880373	1.37171	1.58081	1.0992	1.34759	1.37869
PA2G4	0.538175	0.754603	0.87669	0.818496	0.694596	1.33382	0.894739	0.895669
A2M	0.009076	0.0126074	0.0155078	0.0174052	0.0151374	0.00707088	0.00777875	0.00671752
AEBP2	0.0706925	0.0837426	0.110139	0.107731	0.0948483	0.0562456	0.0624491	0.059498
TULP3	0.00871114	0.0135276	0.0173865	0.0153994	0.0127423	0.0103813	0.0114673	0.0112918
FKBP3	0.647634	0.619634	0.615156	0.482039	0.608371	0.803509	0.697531	0.722933
UTP11L	0.27228	0.257363	0.33189	0.323516	0.347298	0.225304	0.311515	0.251107
COMMD4	0.0478884	0.0500002	0.104613	0.109349	0.0670645	0.0376042	0.0503975	0.0415846
NUTF2	0.347077	0.346627	0.304263	0.275959	0.318077	0.376042	0.336349	0.332677
DNAJA3	0.370793	0.438652	0.467813	0.511156	0.477595	0.324617	0.379808	0.37746
THUMPD1	0.188817	0.171473	0.273321	0.203815	0.207421	0.245231	0.240666	0.241831
ATP2B4	0.00994255	0.00723929	0.00762499	0.00902611	0.00704177	0.00893502	0.0103351	0.00927657
MAP2K3	0.96689	1.46319	1.19348	1.02231	1.67661	2.31089	1.68357	2.06963
SUMO2	5.6554	4.60124	3.90458	3.52633	5.22145	4.88533	5.69711	4.57431
KPNB1	1.43665	1.61657	1.47343	1.14848	1.85385	2.07305	1.47541	1.43627
BIRC5	0.0898478	0.157056	0.100561	0.102231	0.15329	0.105099	0.0934911	0.0735728
PAFAH1B1	0.423699	0.392639	0.3632	0.293106	0.471847	0.392112	0.308959	0.267741
KEAP1	0.268631	0.254295	0.312367	0.349398	0.343466	0.24973	0.235554	0.223597
ECSIT	0.501688	0.450922	0.7846	0.78938	0.661064	0.588168	0.503975	0.610974
ATF5	0.0348445	0.0417179	0.0293581	0.0200257	0.0348735	0.0578526	0.0482063	0.0355069
EMP3	2.55405	2.59203	5.19383	5.20861	2.62031	1.73558	2.35919	2.23917
EHD2	0.00416401	0.00386504	0.00169444	0.00161435	0.00404782	0.00604238	0.00759615	0.00700541
CFD	8.34627	6.99389	12.8188	9.05846	8.47887	5.6567	5.03975	3.71063
EHBP1	0.02025	0.0255522	0.0456763	0.0472334	0.0369334	0.0206662	0.0272074	0.0154823
IGFBP2	0.281402	0.309817	0.453079	0.410866	0.409093	0.530316	0.591623	0.409449
RNF114	0.770776	0.757671	0.821436	0.650268	1.01555	0.787438	0.807091	0.671752
NPEPL1	2.43547	2.11657	3.68357	3.9469	3.06101	2.03127	2.98368	3.7746
SPEN	0.219831	0.201228	0.427294	0.38822	0.246701	0.178058	0.218024	0.198647
RRBP1	0.178327	0.170553	0.345887	0.362338	0.220834	0.135632	0.0986039	0.127313
TRIT1	0.159628	0.112884	0.157657	0.135877	0.161434	0.155238	0.114673	0.164099
RPS21	27.1824	20.6136	22.7276	20.4786	20.4547	23.8481	28.0473	23.1914
TTC3	0.153243	0.147546	0.226171	0.20705	0.13365	0.126312	0.16434	0.16218
SLC25A1	0.0948647	0.115031	0.231697	0.260107	0.109219	0.0726372	0.111751	0.0975639
GGT1	0.103074	0.0773008	0.0891424	0.0818496	0.0670645	0.107992	0.132202	0.125394
HMOX1	3.0603	2.98467	2.02965	1.72758	2.60593	2.76407	3.40731	2.62623
ATF4	10.5355	10.0307	8.50905	7.60263	10.0118	13.7882	11.8325	9.14862
PTX3	0.0629391	0.0880371	0.0596738	0.0537037	0.0799983	0.0723158	0.0796135	0.0559793
TNFSF10	2.5951	3.05216	3.39257	2.91165	4.04782	5.496	3.23932	2.63583
CYB561D2	0.501688	0.441719	0.710929	0.769969	0.656274	0.340688	0.511279	0.415846
BBX	0.948647	0.815953	1.31503	1.2876	0.75208	0.845291	0.927607	0.825295
NLGN4Y	0.00492567	0.00146626	0.00153605	0.00155935	0.00187781	0.00427467	0.00390764	0.0051501
PSMD4	1.99307	2.01841	2.65585	3.07017	2.96521	1.83843	1.88443	1.75615
C5orf30	0.108091	0.119939	0.104613	0.124554	0.169577	0.0816365	0.0909347	0.0799704
DDX41	0.290979	0.299081	0.526751	0.507921	0.332448	0.263551	0.279743	0.287254
CCNB1	0.0448783	0.0699389	0.0861955	0.0805556	0.0670645	0.0649235	0.0500323	0.0457431
C6orf106	0.73885	0.708591	0.534118	0.527332	0.881419	0.745656	0.741355	0.626968
TCP1	5.42736	5.24541	4.38345	4.20571	5.94	5.04603	5.33191	4.83021
CALU	0.0861992	0.0984666	0.177916	0.159817	0.101076	0.0960996	0.103717	0.0802903
SMARCD3	0.843749	0.769941	0.839854	0.744088	1.0395	0.556028	0.675619	0.511811
AVL9	0.0501688	0.0549081	0.097983	0.0805556	0.0833516	0.0523888	0.0573363	0.046063
BCL7B	0.0148226	0.0234357	0.0423611	0.0452923	0.0221792	0.0188342	0.0227885	0.0255266
MMP16	0.000861992	0.00426382	0.0162814	0.00150435	0.00190655	0.00103813	0.00854567	0.00110679
TRIM36	0.00233057	0.00371167	0.00541485	0.00630857	0.0109698	0.0033426	0.00379808	0.00185531
ZCCHC6	0.506249	0.493867	0.593055	0.507921	0.608371	0.523888	0.529539	0.569389
CEL	0.0137736	0.0138957	0.0117874	0.0148494	0.00934112	0.0172272	0.0224598	0.0227756
NEK1	0.0169206	0.02727	0.034073	0.0317693	0.0300353	0.0261944	0.0189173	0.0221038
CLCN3	0.140929	0.15	0.141081	0.145906	0.144668	0.196056	0.178948	0.149705
CHKA	0.0857431	0.0963193	0.118243	0.121319	0.10874	0.0652449	0.0785179	0.0604576
MED24	0.478884	0.539879	1.5471	1.93463	0.438314	0.639593	1.28915	1.66658
BAI1	0.166013	0.128528	0.119716	0.134583	0.101076	0.196056	0.306402	0.29813
HLA-B	33.3851	36.8099	32.1944	30.5399	36.0232	25.7766	23.1171	24.7588
DOHH	0.0734289	0.0849696	0.0699878	0.0692325	0.0713758	0.0604238	0.0661011	0.0658956
ATP5I	1.11284	0.950923	1.79022	1.66611	1.50895	1.48488	1.1942	1.05241
RBM10	0.693242	0.625769	0.740398	0.69556	0.704177	0.494961	0.562407	0.543799
DEGS1	0.547296	0.549081	0.861955	0.918786	0.972435	0.633165	0.598927	0.521407
AS3MT	0.000948647	0.00263191	0.00281425	0.0181493	0.00201193	0.00261301	0.000847263	0.0106841
S100A11	5.60979	4.72394	11.8243	9.41433	5.31726	5.36744	5.11279	6.26968
IL10	0.0190642	0.015951	0.0155815	0.0154641	0.00550887	0.0240731	0.0292525	0.0292052
CAPZB	0.556418	0.533744	0.696195	0.666444	0.574838	0.5496	0.587971	0.585384
INTS3	0.0393597	0.0457057	0.0961412	0.0760263	0.0507774	0.035033	0.0412675	0.0422244
PSAP	6.56756	6.25769	4.56763	3.9469	5.50887	4.53179	5.77015	4.79823
TCF7L2	0.000903039	0.00153681	0.00744081	0.00299253	0.00199277	0.00109277	0.00250892	0.00120276
CUEDC2	0.289611	0.255829	0.61884	0.598505	0.367418	0.234625	0.278647	0.255266
FRAT1	0.0245827	0.0296013	0.0361358	0.030087	0.0294605	0.0271265	0.0319915	0.0444636
H2AFY2	0.0269544	0.0298774	0.0427294	0.0378514	0.0331011	0.0331046	0.0471107	0.0438238
NDUFV1	0.506249	0.478529	1.0977	1.03525	0.531726	0.35033	0.507627	0.457431
SLC22A18	0.0361672	0.0286504	0.0298738	0.0355868	0.0228019	0.0427467	0.0566059	0.0470226
ZNF26	0.119493	0.135583	0.139976	0.143641	0.152811	0.100921	0.113577	0.103002
TUBA1B	10.0338	10.2761	10.093	11.1937	11.8321	10.4456	8.94739	7.80511
BICD1	0.00408192	0.00984666	0.0115296	0.0131024	0.00617951	0.00787438	0.00467455	0.00396653
PTMS	10.9459	16.6872	26.2639	29.0194	16.3829	18.8342	24.9066	30.6447
TRAFD1	0.0428716	0.0487732	0.0386775	0.0359103	0.0461787	0.0575312	0.0573363	0.0546998
USPL1	0.0816384	0.100921	0.159499	0.146553	0.127423	0.0935284	0.0781527	0.0780511
SACS	0.444222	0.352762	0.239064	0.232285	0.317598	0.321403	0.401719	0.393455
DYNC1H1	1.41841	1.26687	1.35555	1.2876	1.62392	0.993137	1.22707	1.04921
ARG2	0.0317888	0.0435584	0.0578321	0.0530567	0.0493403	0.190592	0.0500323	0.0409449
BATF	1.62821	1.27608	1.42923	1.42347	2.36163	1.34347	1.97208	1.23154
SETD6	0.105811	0.104295	0.114191	0.114848	0.0934112	0.103492	0.117594	0.120276
IL4R	12.3598	8.12886	5.34118	5.82329	12.3111	9.67424	8.07091	10.4281
MT3	2.44915	2.30982	2.78846	3.16723	1.40835	2.88299	4.16327	4.15846
SREBF1	2.76841	2.48467	1.55815	1.89904	3.37718	2.18554	2.39206	3.15403
ZZEF1	0.163733	0.130368	0.136292	0.122936	0.104429	0.159738	0.20086	0.194488
RBM4	0.357111	0.349694	0.611473	0.585565	0.429692	0.256159	0.306402	0.29877
MZF1	0.0816384	0.0696321	0.142923	0.118083	0.101555	0.0504603	0.0854567	0.0873277
ZNF211	0.0492567	0.0558284	0.123031	0.115495	0.0713758	0.0475677	0.0529539	0.0559793
GIPC1	0.0743411	0.0509204	0.0803018	0.0886435	0.0453643	0.0742442	0.117959	0.0796506
GLTSCR1	1.98851	1.30982	1.46974	1.60788	1.2359	1.29847	1.65435	1.69857
GATAD2A	0.542736	0.527609	0.692511	0.656738	0.632322	0.578526	0.617187	0.591781
NFIC	0.0259054	0.0337424	0.0326733	0.0342927	0.0414842	0.0343902	0.0372504	0.0409449
CHPF	0.0116301	0.0180675	0.0127083	0.0138465	0.0104908	0.0219519	0.0124168	0.0102362
HDLBP	0.3863	0.346627	0.456763	0.407631	0.453643	0.395326	0.31955	0.387057
RANBP2	1.2223	0.993868	1.04613	0.951138	1.24548	0.935284	1.19055	1.16117
EXT2	0.29782	0.258896	0.323049	0.365573	0.348256	0.243302	0.281204	0.245349
FERMT1	0.00729729	0.0127301	0.00640941	0.0118731	0.00675435	0.00954568	0.00796135	0.00483021
PES1	0.100338	0.0901843	0.0578321	0.0627622	0.0507774	0.133061	0.150097	0.137549
MCM5	0.347989	0.352762	0.869323	0.909081	0.429213	0.263872	0.314437	0.277018
MPST	0.939526	0.736199	0.666726	0.731147	1.01076	0.697445	0.668315	0.537401
SCO2	0.583783	0.745401	1.58025	1.53023	0.967645	0.803509	0.642751	0.51501
SLC4A7	0.0212077	0.02227	0.0397826	0.0349398	0.0296521	0.0225304	0.0315898	0.0245029
UQCRC1	0.519932	0.509204	1.10507	1.13878	0.555677	0.347116	0.427283	0.396653
SEMA3B	0.0360304	0.0447854	0.0338888	0.0359103	0.037125	0.0443537	0.0376156	0.0390256
FXR1	1.10371	1.05215	1.06455	1.00614	1.10656	0.887073	1.12481	1.0748
HARS	0.277297	0.241719	0.419927	0.375279	0.243827	0.212126	0.278282	0.26934
IK	3.26097	2.39878	2.8695	2.61078	3.92327	3.02441	3.33792	3.16683
ZNF131	0.953208	1.00614	0.791968	0.740852	1.29818	0.93207	0.945867	0.982037
TCERG1	0.126334	0.139571	0.170918	0.1527	0.177242	0.133704	0.120881	0.113878
FAM105A	0.221199	0.199387	0.237222	0.233902	0.261072	0.196699	0.218755	0.183932
GPX3	0.0105811	0.0226074	0.0190072	0.01527	0.00886209	0.0145596	0.0119785	0.00780511
SLC12A2	0.0153243	0.0107362	0.0225803	0.017664	0.0223708	0.0104456	0.0116499	0.00748523
CDC23	0.172854	0.199694	0.25785	0.244255	0.216522	0.170344	0.199764	0.171776
HTR4	0.00409104	0.00855831	0.00339257	0.00246519	0.00184906	0.00678161	0.00861871	0.00710137
LSP1	9.30404	8.19021	16.8339	14.4288	10.0118	5.78526	8.18047	7.8371
MAP3K5	1.73311	1.67178	1.35187	1.15819	1.81553	1.6488	1.89904	1.52264
PDSS2	0.0656756	0.0766873	0.100561	0.0925257	0.0713758	0.0703874	0.0755963	0.059498
SOD2	15.9628	11.8099	12.3031	9.22022	14.7063	18.7378	16.1053	15.8022
TRMT11	0.028505	0.0365032	0.0475181	0.0417336	0.0466098	0.0353544	0.032941	0.0312524
PMPCB	2.13446	1.68405	1.37397	1.26171	1.75805	1.63916	1.67261	1.59301
NSMAF	1.44121	1.52454	1.11244	0.999666	1.51853	1.52345	1.47175	1.51944
SARDH	0.215726	0.128528	0.0589371	0.0604976	0.0507774	0.210841	0.285221	0.253346
ALDH1B1	0.0266807	0.0220246	0.0195966	0.0180846	0.0195445	0.0282835	0.0335618	0.0261024
DPYD	0.871114	0.849696	1.17874	1.15172	1.01555	0.787438	0.909347	0.786909
ACTB	15.6892	14.1411	7.66183	7.11736	13.0297	15.2345	11.869	11.8676
RCOR3	0.319256	0.395707	0.249009	0.232285	0.340592	0.572098	0.434587	0.419045
PIGG	0.330658	0.355829	0.508333	0.475569	0.438314	0.274479	0.304942	0.361466
HLA-DQB1	0.51081	0.769941	0.954045	2.37785	0.708967	0.424253	0.379808	0.834891
APOD	0.000989694	0.00160737	0.0013666	0.0115495	0.00218439	0.0019702	0.00190269	0.00566191
ATRX	0.173311	0.163191	0.168708	0.182463	0.179637	0.154916	0.174931	0.166339
TMSB15A	0.0380827	0.0246933	0.0442028	0.0410866	0.0353526	0.0359972	0.0368852	0.0213681
UBA1	0.206604	0.229755	0.308683	0.297312	0.204547	0.173879	0.208529	0.220399
USP9Y	0.00980573	0.00144786	0.0012561	0.00157229	0.0171972	0.0010542	0.000788831	0.00114838
AKAP13	2.18919	2.1043	3.97826	3.52633	2.53887	1.97663	2.02321	1.94168
LRRC41	0.0104442	0.0187117	0.0259692	0.0272401	0.0172931	0.0142382	0.0104812	0.0103642
FBXO28	0.186993	0.191718	0.19965	0.229697	0.215085	0.172594	0.1826	0.150344
CDC73	0.230321	0.23589	0.212542	0.226785	0.328137	0.272229	0.22898	0.211122
HIST3H3	40.4087	38.9572	28.7318	25.3313	42.2985	48.8533	40.1719	41.9045
CNN3	0.00270456	0.00598161	0.00688828	0.00727912	0.00297	0.00488533	0.00419979	0.00308046
NOLC1	0.0538175	0.0650309	0.0725663	0.0737617	0.0857467	0.0523888	0.0496671	0.0415846
COMMD3	1.49138	1.38957	1.54342	1.45259	1.74847	1.37239	1.57401	1.22835
GLUD1	0.638513	0.696321	0.87669	0.89614	0.828725	0.588168	0.686575	0.575787
MLF2	0.412753	0.377302	0.339994	0.31284	0.426818	0.287335	0.336349	0.35187
CHORDC1	0.169206	0.163497	0.225803	0.186669	0.228498	0.224982	0.216563	0.192249
MRPL49	0.00702364	0.0144172	0.0101667	0.0107407	0.00541306	0.0134347	0.00982387	0.00956446
CAPN1	0.109915	0.118712	0.0957728	0.109672	0.128381	0.113455	0.0916651	0.105561
MMP13	0.00085287	0.00478529	0.0061884	0.00404395	0.00187302	0.00301155	0.00269517	0.00175295
GAPDH	3.45253	3.19019	5.12016	4.91745	3.75561	2.32696	2.78647	2.55586
ARFIP2	0.147314	0.114418	0.187862	0.175993	0.111614	0.140453	0.199764	0.175615
ZNF148	2.54037	2.16258	2.21014	1.94757	2.376	2.17912	2.07068	2.08243
GNS	0.0329746	0.0392639	0.0817753	0.0863789	0.0526935	0.0347116	0.0353878	0.0355069
TNFRSF1A	0.506249	0.389572	0.548852	0.462628	0.536516	0.443537	0.441891	0.508612
SLC11A2	0.0314239	0.0355829	0.0394142	0.0420571	0.0391369	0.0286049	0.0245049	0.0253986
RUNX1T1	0.00193378	0.00993868	0.0119348	0.0160141	0.00766451	0.0142703	0.0131837	0.00854084
CCND2	0.0893918	0.118405	0.109034	0.101908	0.116405	0.126633	0.100065	0.0850885
IGFBP6	0.00357567	0.00481597	0.00806702	0.00582329	0.00565258	0.00536744	0.00533191	0.00383858
UBL3	0.372162	0.383437	0.379408	0.365573	0.431129	0.313047	0.38346	0.364665
NDUFB1	1.87449	1.33129	2.19541	2.02845	1.94008	2.00556	2.22772	2.07603
ABHD2	0.0807262	0.0644174	0.127083	0.0938197	0.0977225	0.0684589	0.0715791	0.0857283
KRT8	0.871114	0.990801	2.19909	2.65283	0.627532	1.04778	1.826	2.28396
PSMB10	5.60979	5.18406	8.98791	8.79965	6.22742	4.30681	5.84319	4.54232
GLG1	0.551857	0.506136	1.02772	0.934962	0.467535	0.469249	0.540495	0.553395
DHRS7B	0.281858	0.223927	0.279215	0.291812	0.2673	0.210198	0.273169	0.264222
PTRF	0.00315608	0.00723929	0.0028032	0.00233579	0.00312329	0.00607452	0.00471107	0.00470226
RPL27	35.4374	30.6749	31.0157	30.0223	31.7119	32.7832	39.8067	33.5876
RPS7	18.9273	18.0062	21.4752	22.6785	23.4247	19.4449	21.4007	15.2903
DRG2	0.167838	0.178528	0.419927	0.40116	0.166224	0.149453	0.220946	0.192569
CXXC1	0.147314	0.150614	0.225066	0.191198	0.172452	0.120205	0.131472	0.141068
LTBP4	0.173311	0.180062	0.471497	0.475569	0.223708	0.109599	0.23884	0.18905
LRRC47	0.00506249	0.0138651	0.0146606	0.0147847	0.019784	0.0104456	0.00858219	0.00988435
FZR1	0.0214358	0.0187424	0.0164287	0.0161111	0.0228019	0.0261944	0.0327949	0.0276378
LSR	0.0789019	0.105829	0.269637	0.323516	0.117842	0.106063	0.226424	0.308046
DNPEP	0.268631	0.262577	0.390458	0.414101	0.304664	0.209555	0.298368	0.261343
SLC25A12	0.290523	0.288344	0.20849	0.210933	0.345861	0.23141	0.245414	0.21592
RPL37A	30.3293	25.1841	25.2325	26.0431	26.9695	24.2017	27.463	21.7839
EIF2AK2	0.483445	0.785278	0.858272	0.760263	0.780822	1.57166	0.752311	0.495817
DCTN1	2.85506	4.69327	12.0821	14.4612	5.02984	5.59242	7.85179	10.9719
RND3	0.00333395	0.00153988	0.00133714	0.00165964	0.00208379	0.00225304	0.00279012	0.00198647
MPV17	0.141385	0.154295	0.349571	0.346163	0.159039	0.128883	0.128185	0.152264
ID2	1.25422	1.1043	2.44589	2.43284	1.17842	1.13777	1.58131	1.39788
PIGP	0.204324	0.23405	0.401509	0.420571	0.25245	0.219519	0.281204	0.268381
TMF1	0.073885	0.0858898	0.139607	0.131024	0.132213	0.146881	0.104082	0.127953
ACIN1	0.16875	0.103681	0.176811	0.163052	0.0809564	0.186414	0.266961	0.24439
ATP2C1	1.22686	1.32516	0.644625	0.659973	1.31734	1.01885	1.20151	0.962844
GNAI2	0.39451	0.404909	0.685144	0.656738	0.526935	0.3664	0.398067	0.428642
SEC62	0.226216	0.253988	0.257482	0.239726	0.346819	0.395326	0.221676	0.248228
SLIT2	0.00187449	0.00558284	0.00169444	0.0016564	0.00199277	0.00359972	0.00401719	0.00399852
PDLIM4	0.233969	0.152761	0.141449	0.163052	0.0891	0.258087	0.445543	0.380659
PDLIM7	0.213902	0.191718	0.445712	0.359103	0.25245	0.15813	0.193921	0.195128
RAPGEF6	0.219831	0.210123	0.430978	0.323516	0.191134	0.257766	0.304942	0.348671
GCLC	0.435101	0.625769	0.260428	0.272724	0.550887	1.30168	0.606231	0.633366
BYSL	0.0893918	0.120553	0.144764	0.182463	0.139877	0.0922428	0.0986039	0.0796506
HLA-F	11.6301	12.3927	15.2868	15.4641	13.2213	10.542	10.6273	11.0039
GNL1	0.103986	0.0969328	0.0946678	0.0922022	0.0914951	0.0723158	0.108829	0.0985236
CCHCR1	0.185169	0.162884	0.170549	0.169846	0.155206	0.182879	0.255274	0.233834
HLA-DRB3	1.43209	1.32822	1.92282	2.09315	0.910161	0.96421	1.05177	1.06201
CCNC	0.153243	0.133129	0.190072	0.179552	0.156164	0.181593	0.177487	0.166339
FIG4	0.0588344	0.0730064	0.129662	0.14073	0.0838306	0.0626737	0.0602579	0.0531004
NDUFA4	7.11485	5.49081	6.77777	7.27912	6.17951	7.328	7.59615	6.78149
PPP1R9A	0.0084831	0.0173313	0.0146238	0.0155611	0.00517355	0.0153952	0.010116	0.00834891
ADAP1	0.0218463	0.0322087	0.0271479	0.0229697	0.0382268	0.0222733	0.0189539	0.0186171
EPHB6	0.0638513	0.0702456	0.153605	0.132965	0.0694596	0.0546386	0.0668315	0.0735728
ATP6V1C1	1.0353	0.849696	0.648308	0.566154	1.05866	0.928856	0.847263	0.930856
OPTN	21.0709	24.4173	15.5815	15.8847	34.3945	39.854	38.7112	42.5443
PTGDS	3.23361	1.88958	3.72041	10.2231	3.44903	1.48167	2.50892	2.37672
ZER1	0.176047	0.238344	0.222856	0.188934	0.29221	0.331046	0.246875	0.285335
BAG1	53.3614	52.1474	27.1111	28.34	70.8967	58.8168	65.7359	75.812
SEPHS2	1.00338	0.858898	1.17506	0.993195	1.0395	0.842077	0.861871	0.745324
WWP1	0.334763	0.293866	0.337783	0.305076	0.299395	0.318511	0.354974	0.301009
RPS27L	2.025	1.65645	1.41449	1.31348	1.48021	2.07627	2.46875	2.13361
TCEA2	0.0325185	0.0383437	0.0777233	0.0854083	0.0555677	0.0267729	0.0316993	0.0319882
FGG	0.000893918	0.00139264	0.00127452	0.00183434	0.00187781	0.0025873	0.00147906	0.00210482
EIF1AY	1.95658	0.137424	0.247168	0.217403	2.19397	0.247159	0.223867	0.275418
TM2D1	0.884796	0.840493	0.523067	0.517626	0.867048	0.903144	0.967779	0.886072
MAP7D1	1.37736	1.11964	0.99088	0.977019	1.41314	0.784224	0.909347	0.882874
DDOST	0.925843	0.825156	0.61884	0.630857	0.867048	0.511031	0.675619	0.562992
PANK4	0.085287	0.0693254	0.0880373	0.0828202	0.0876629	0.0726372	0.116133	0.10812
HSD11B2	0.00893918	0.00815953	0.00276636	0.00250402	0.00488613	0.00890288	0.0145349	0.0097244
C11orf68	0.378091	0.365032	0.570953	0.59527	0.416279	0.353544	0.496671	0.489419
RBM14	1.4549	1.2178	1.78285	1.64993	1.24069	1.22455	1.62149	1.65379
E4F1	0.133632	0.12362	0.214384	0.202845	0.1782	0.106063	0.126359	0.118676
RHOG	3.28834	3.12884	9.76146	9.67314	4.29213	2.34625	2.7463	3.07726
IFNG	0.0615709	0.0579756	0.0585688	0.0805556	0.0924532	0.0601024	0.116499	0.0959645
TENC1	0.0116757	0.0109203	0.00983513	0.00763499	0.00814354	0.0159416	0.0189904	0.013563
CKAP2	0.337043	0.392639	0.28032	0.307341	0.439272	0.31144	0.334888	0.314764
CUL4A	0.798141	0.785278	0.427294	0.404395	0.675435	0.851719	0.836307	0.713336
C14orf132	0.0185169	0.00904911	0.0216226	0.0172111	0.0195924	0.012599	0.0110655	0.0170177
DDX24	0.0629391	0.0726996	0.121189	0.145582	0.0891	0.0572098	0.0514931	0.0601378
TM9SF1	0.298733	0.303682	0.504649	0.517626	0.353526	0.246838	0.277552	0.253026
PSME1	12.3598	11.6565	14.5869	13.5553	14.7063	13.7561	12.3803	9.56446
MAX	0.716046	0.742334	0.92826	0.957608	0.776032	0.916	0.792483	0.882874
FBLN5	0.0752533	0.0570554	0.0994564	0.078938	0.0656274	0.0469249	0.0427283	0.0607775
PITPNM1	0.035255	0.0401842	0.0364673	0.030637	0.0241432	0.0290227	0.0525887	0.0572588
TCF12	0.0811823	0.10951	0.142923	0.137818	0.116405	0.0986709	0.0953171	0.0953248
CSK	0.665877	0.585891	0.600422	0.585565	0.632322	0.404968	0.551451	0.531004
ZNF768	0.0177415	0.0181902	0.0405193	0.011129	0.0183948	0.0179665	0.0390764	0.0139788
E2F4	0.0556418	0.0699389	0.0780917	0.0779674	0.0761661	0.0642807	0.0598927	0.0687746
CDK10	0.014777	0.0195093	0.0351413	0.0314134	0.0226103	0.0169701	0.0157036	0.0146506
RNPS1	0.366689	0.352762	0.325628	0.298929	0.345382	0.269336	0.312611	0.287254
CDH11	0.00085287	0.00140798	0.00129662	0.00160788	0.00188739	0.00102206	0.000803439	0.00118676
GTF3C1	0.0193378	0.0221166	0.0297264	0.0301194	0.0266342	0.019477	0.0212911	0.0254946
IFI35	0.254493	0.328222	0.287687	0.303458	0.316161	0.462821	0.32941	0.258784
RSAD1	0.218006	0.215031	0.300211	0.279195	0.246222	0.209555	0.268787	0.222638
WBP2	0.403631	0.420247	0.297632	0.308958	0.36119	0.556028	0.536843	0.607775
RALBP1	0.438749	0.475462	0.478864	0.397925	0.512564	0.78101	0.525887	0.578986
CHMP2A	3.85844	3.22087	4.08876	3.29987	3.81309	2.96334	3.20645	2.9621
ZNF274	0.0957769	0.110123	0.159499	0.137494	0.119279	0.0851719	0.0861871	0.0940452
BLVRB	5.51857	7.91413	8.14069	8.41143	10.2992	8.26007	9.71431	11.3878
TLE2	0.0447871	0.0423314	0.104613	0.0750558	0.0389453	0.0411396	0.0445543	0.0556594
USF2	0.0469763	0.0558284	0.0626207	0.059527	0.0570048	0.0485319	0.0493019	0.0559793
ZNF492	0.00579222	0.0139264	0.014808	0.0131671	0.00795193	0.0154274	0.00832655	0.0103002
AOX1	0.0096233	0.00840493	0.00755132	0.00443217	0.00479032	0.00813151	0.00788831	0.00479823
NAGK	2.22111	2.12271	2.81425	2.22903	2.78797	2.33982	1.69818	1.64739
PPIG	0.39907	0.453989	0.692511	0.585565	0.627532	0.639593	0.587971	0.658956
BCL2L11	0.0302381	0.0242332	0.0548852	0.0449688	0.0157122	0.0363186	0.0529539	0.0495817
PRPF6	0.583783	0.478529	0.365779	0.339692	0.531726	0.305333	0.372504	0.326279
FKBP1A	0.425979	0.441719	0.274426	0.259137	0.449332	0.404968	0.489367	0.438238
SNRPB	0.345253	0.414112	1.07929	1.21966	0.536516	0.331046	0.336349	0.335876
ZNF337	0.126334	0.112577	0.19965	0.179552	0.123111	0.0999565	0.144254	0.129232
ATP5J	3.46165	2.82516	2.84003	2.65283	3.20472	3.5033	3.50592	3.39075
SOD1	10.5355	7.73008	6.37258	6.34092	7.04177	10.5742	13.1837	10.0123
BID	1.86081	2.00001	1.94861	1.79228	2.7209	1.81593	2.00495	1.94168
RHBDD3	0.0446503	0.0441719	0.0570953	0.0520861	0.0498193	0.0411396	0.0430935	0.0438238
PRDX2	0.0747972	0.18681	0.173128	0.184081	0.266342	0.284121	0.195017	0.240551
CRELD1	0.242179	0.214111	0.416243	0.414101	0.227061	0.233982	0.322471	0.288213
AP2M1	0.39451	0.481597	0.780917	0.766734	0.689806	0.642807	0.551451	0.687746
EGF	0.0488006	0.0539879	0.0596738	0.0802321	0.0522145	0.0543172	0.0379808	0.0364665
TRAF4	0.0375354	0.0395707	0.0297264	0.0311223	0.0290293	0.0392112	0.0503975	0.0492618
PPP1R10	1.00794	0.914113	0.651992	0.627622	0.972435	0.694231	0.843611	0.796506
RHOBTB3	0.00239442	0.00791413	0.0202596	0.0321252	0.00843096	0.0038247	0.00536843	0.00444636
SOBP	0.0113564	0.0161657	0.0102772	0.0131671	0.00723338	0.0116669	0.00796135	0.00582185
IGF2R	1.00338	1.01534	1.7718	1.27142	1.41314	0.739228	0.854567	1.03962
EIF3B	1.17213	1.27301	1.5913	1.62729	1.60955	1.12813	1.36219	1.47465
MRPS33	0.45608	0.411044	0.445712	0.381749	0.376519	0.475677	0.558755	0.476624
POLR2K	0.186081	0.15951	0.121926	0.141053	0.314245	0.174843	0.220215	0.164099
PTGR1	0.00770776	0.00935586	0.00607789	0.00708501	0.00809564	0.00993137	0.00810743	0.00825295
STARD5	0.0602026	0.0487732	0.0847221	0.0666444	0.0493403	0.0633165	0.0781527	0.0748523
ABCC2	0.0247652	0.0267792	0.0318629	0.0260754	0.03267	0.0249409	0.0218755	0.0236393
ANKRA2	1.21317	1.16258	0.7846	0.744088	1.39877	1.02206	1.17959	1.20595
SNRNP35	0.304662	0.259817	0.279951	0.254931	0.315203	0.230125	0.248701	0.231594
SSNA1	0.381283	0.377302	0.692511	0.685855	0.507774	0.30469	0.363008	0.339075
ASMTL	0.416401	0.340492	0.537801	0.543508	0.403824	0.218876	0.363008	0.342273
COX7B	0.716046	0.555216	1.2782	1.18083	0.507774	0.761726	0.978735	0.879675
NDUFA1	4.16857	2.71166	4.38345	3.8822	2.2754	3.79256	4.60151	3.80659
SLC6A8	0.292804	0.328222	0.346256	0.326752	0.479032	0.668519	0.471107	0.684547
KLHL20	0.0725168	0.0739266	0.104613	0.0973784	0.0833516	0.0813151	0.0770571	0.0735728
SLC19A2	0.117213	0.121473	0.0917209	0.0860554	0.155685	0.101885	0.112481	0.104601
GLRX2	0.172398	0.170246	0.162445	0.159494	0.251013	0.171308	0.182235	0.183612
GLMN	0.067956	0.0785278	0.0534118	0.049498	0.0914951	0.0575312	0.0547799	0.0508612
PAFAH1B3	0.0802701	0.0944788	0.249746	0.231314	0.124548	0.071673	0.0766919	0.0655758
PEX14	0.807262	0.736199	0.696195	0.757028	0.886209	0.710302	0.704835	0.713336
VIM	51.9932	42.6382	30.5736	29.8606	45.4122	39.2112	37.6156	36.7864
GTF2F1	0.551857	0.542946	1.11244	1.08702	0.723338	0.568884	0.551451	0.524606
ARFGAP2	0.0390405	0.0438652	0.0714613	0.068909	0.0441668	0.0331046	0.0312611	0.0387057
POLA2	0.019201	0.0319019	0.0314209	0.0349398	0.0250055	0.0220161	0.0169087	0.0177854
PC	0.0285506	0.0361964	0.0397826	0.0352633	0.0354484	0.0343902	0.0345114	0.0348671
PNPLA6	0.051081	0.0641106	0.10977	0.116789	0.074729	0.0498175	0.0496671	0.0546998
HSPB2	0.00116301	0.00178221	0.0015471	0.00186669	0.00245743	0.00130811	0.000986039	0.00138189
NACA	13.6824	10.8589	12.782	10.7731	13.2692	17.1951	19.4651	18.1373
PTPN6	0.766215	0.785278	1.16032	1.16789	0.728129	0.671733	0.602579	0.681348
EXOSC8	0.519932	0.478529	0.308683	0.275312	0.512564	0.443537	0.478411	0.476624
LAMP1	26.7263	22.8835	14.8448	15.1729	25.1013	19.4128	25.1257	21.9119
HSP90AA1	3.15608	2.95093	3.4073	3.14458	4.03345	2.73193	2.93986	2.22638
DHRS4	0.148226	0.149387	0.179022	0.205109	0.199756	0.112813	0.109195	0.113558
CYP1A1	0.0312415	0.0207363	0.0164287	0.0089614	0.0120237	0.0347116	0.0503975	0.043184
SCAPER	0.0839188	0.107362	0.155078	0.173728	0.100597	0.0916	0.0843611	0.0998031
MMP2	0.00100338	0.00167792	0.00138502	0.0016564	0.00221792	0.00135632	0.00129646	0.00125074
CREBBP	0.416401	0.417179	0.256376	0.220315	0.641903	0.3664	0.390764	0.387057
MINK1	0.880235	0.858898	1.09402	1.34906	0.550887	1.10884	1.87713	2.21998
UBXN6	14.9594	13.8651	13.2977	11.776	20.5505	19.5092	16.7627	19.5128
APOE	0.10125	0.0641106	0.0769866	0.0867024	0.042059	0.106706	0.198669	0.192569
MRPL4	0.0579222	0.0699389	0.171286	0.155611	0.0809564	0.053353	0.0704835	0.0578986
ZNF580	0.158716	0.156442	0.362095	0.365573	0.180595	0.121812	0.144619	0.146186
STK11	0.215726	0.204295	0.22654	0.223226	0.243348	0.207305	0.250527	0.286934
PNKP	0.0656756	0.0634971	0.0758815	0.0747323	0.0608371	0.0556028	0.0912999	0.0902067
DAPK3	0.0444222	0.0607364	0.0453079	0.0456158	0.0560467	0.0408182	0.0474759	0.0463829
BIN1	0.320625	0.234357	0.438345	0.336457	0.329095	0.250373	0.358261	0.326279
ASB1	0.0556418	0.0690186	0.0655676	0.0724677	0.0699387	0.0559242	0.0624491	0.0467027
ATG9A	0.259966	0.224234	0.191914	0.186345	0.279755	0.321403	0.316993	0.329478
CAPG	4.20506	4.01842	4.42028	5.37037	4.38793	2.56159	3.46209	2.63902
DDX49	0.0820945	0.0990801	0.140712	0.138789	0.116405	0.0877431	0.0741355	0.0834891
EMILIN1	0.208429	0.294173	0.847221	0.98349	0.295563	0.310476	0.719443	0.934055
RBCK1	0.390405	0.420247	0.644625	0.517626	0.555677	0.369614	0.401719	0.35187
IDH3B	0.816384	0.726996	1.11981	1.01261	0.814354	0.617095	0.854567	0.764517
FLRT3	0.000834627	0.0013773	0.00126715	0.00160464	0.0018299	0.00240731	0.000788831	0.00117716
HNRNPM	7.84458	6.16566	5.59903	5.75859	6.27532	5.23888	5.73363	5.31004
UFD1L	1.41841	1.25767	1.53237	1.417	1.71972	1.62309	1.58862	1.68258
UBE2L3	0.96689	0.834358	0.814069	0.78291	0.857467	0.703874	0.799787	0.642962
SGSM3	0.0875674	0.0831291	0.0850905	0.088967	0.0737709	0.0697445	0.0734051	0.0754921
DHX30	0.323817	0.309817	0.578321	0.549978	0.390411	0.289584	0.30202	0.299409
SS18L2	3.01925	2.46627	1.98176	1.67258	2.6251	2.7255	3.05307	2.67101
CNN2	0.208429	0.184356	0.226908	0.202521	0.213169	0.161666	0.153384	0.181053
IL17RC	0.00939526	0.011043	0.00920893	0.00718206	0.0145626	0.0107349	0.0143158	0.0121875
EVC	0.00252669	0.00340492	0.00375724	0.00260754	0.00184906	0.00131133	0.00167627	0.00111959
IDUA	0.0393597	0.0500002	0.130398	0.122289	0.0689806	0.0459607	0.0584319	0.0585384
HHIP	0.00389949	0.00398774	0.0013224	0.00267225	0.0025245	0.005496	0.00598927	0.00390256
PRPF40A	1.66013	1.60123	1.93387	1.64346	2.19876	1.95092	1.93191	1.83612
MAPK9	0.0656756	0.0944788	0.0788284	0.0844378	0.125027	0.0684589	0.0536843	0.0508612
C7orf26	0.465202	0.429449	0.68146	0.672914	0.526935	0.38247	0.496671	0.463829
RPS20	64.3073	50.6136	34.8466	32.9987	40.8135	56.2456	57.7015	53.1004
TNFRSF10B	0.0210709	0.0312884	0.0405193	0.0346163	0.0334364	0.0258087	0.0230441	0.0203445
CYP7B1	0.0148682	0.0249387	0.0184915	0.0228726	0.0246222	0.0392112	0.0303116	0.0318602
CPSF1	0.0934965	0.102148	0.125241	0.120348	0.112093	0.0726372	0.0693879	0.121875
NINJ1	4.51976	4.07977	9.57728	8.8967	3.85142	3.18189	3.79808	3.93455
IKBKAP	0.358023	0.392639	0.545168	0.50145	0.431129	0.319154	0.394416	0.438238
ORM1	0.226672	0.141411	0.235012	0.134583	0.319993	0.136275	0.26477	0.133391
CSPP1	0.944086	0.938653	1.21558	0.944668	1.02992	1.55881	1.34393	1.68898
HIPK2	0.363496	0.303068	0.254535	0.246519	0.493403	0.411396	0.272074	0.24247
CSTA	6.56756	4.81597	6.48308	4.85275	7.13758	5.8174	6.71967	5.43799
SEC31A	0.240354	0.20951	0.375724	0.346163	0.215085	0.254873	0.314072	0.266142
ATP10D	0.0816384	0.0975463	0.077355	0.12423	0.126464	0.0588168	0.0671967	0.0607775
ALDH4A1	0.09076	0.0668714	0.0559903	0.0566154	0.0502984	0.0713516	0.0982387	0.0873277
MRPL12	0.0451976	0.0592026	0.0898791	0.088967	0.0665854	0.0478891	0.0522235	0.0473425
USP3	0.948647	0.736199	1.24873	1.01261	0.914951	0.835649	0.898391	0.844488
DYM	0.670438	0.665646	0.563586	0.520861	0.780822	0.559242	0.573363	0.559793
OSBP2	0.0309679	0.0536811	0.0917209	0.0909081	0.101555	0.187378	0.0989691	0.157382
COL4A3	0.00263614	0.00435584	0.00865639	0.00172111	0.00318077	0.00491747	0.0027463	0.00137869
E2F6	0.262702	0.253682	0.20849	0.220315	0.249576	0.219197	0.256735	0.220079
ZNF692	0.142297	0.154908	0.209227	0.168876	0.167661	0.14431	0.143158	0.141388
KCNJ15	5.19932	5.00002	4.67813	3.26752	7.4729	5.30316	4.85715	6.01378
APOL1	0.0172398	0.0289571	0.0519383	0.0537037	0.0359274	0.0324617	0.0211085	0.0205684
HES1	0.0334763	0.0423314	0.0902475	0.0766734	0.0675435	0.0385684	0.0489367	0.0364665
CPA3	0.265439	0.150614	0.175338	0.236814	0.149937	0.074887	0.127455	0.113238
RBM5	4.13665	4.41719	4.86231	4.30277	5.41306	3.5033	3.87112	3.99852
RPL14	37.1249	31.9019	24.0905	21.7403	29.5563	34.0688	33.3062	25.9424
PRKCI	0.125422	0.111964	0.183442	0.151082	0.14371	0.10992	0.138411	0.129552
FAT4	0.0194746	0.0386504	0.00607789	0.00553213	0.00517355	0.0485319	0.0290334	0.0245349
ATG12	0.506249	0.444787	0.416243	0.391455	0.584419	0.527102	0.489367	0.467027
LYPLA1	0.96689	0.944788	0.950361	0.867024	1.2359	0.973852	1.11386	1.04281
DSE	0.729729	0.506136	0.563586	0.462628	0.478074	0.691017	0.591623	0.505413
TREM1	1.61452	1.25154	1.84547	1.26818	1.76763	1.06385	1.22342	1.39468
CUL7	0.0258598	0.0207056	0.0228013	0.0219021	0.0153769	0.0237517	0.0287047	0.0258464
C11orf48	0.798141	0.711659	1.25978	1.20672	0.881419	0.896716	0.872827	0.790108
DDAH2	0.127246	0.117792	0.208122	0.227108	0.161913	0.141096	0.0953171	0.121875
SRPK1	4.88006	3.52762	2.8695	2.60107	5.22145	3.76042	4.16327	4.03051
EZR	1.27703	1.03988	0.873006	0.89614	1.06345	0.829221	1.1029	0.959645
PGM3	0.073885	0.0806751	0.0902475	0.0731147	0.07425	0.0951354	0.0792483	0.0857283
GMNN	0.171942	0.200307	0.197439	0.185698	0.269216	0.195735	0.186617	0.166019
SLC13A4	0.0138192	0.0144172	0.00519383	0.0039469	0.0045508	0.016488	0.0197208	0.0149705
LRP8	0.062483	0.0733131	0.0589371	0.0475569	0.0958064	0.0700659	0.0639099	0.0610974
AK2	0.197483	0.201841	0.256745	0.26496	0.205505	0.156845	0.166896	0.130832
PEX1	0.0948647	0.0889573	0.111244	0.0967314	0.106345	0.104778	0.106638	0.0998031
TMEM63A	0.115388	0.114418	0.180863	0.158523	0.125027	0.0887073	0.112116	0.115157
CNIH4	2.09797	1.69019	1.52868	1.25201	1.90176	2.16947	2.23867	1.83292
TROVE2	0.370337	0.331289	0.331153	0.305076	0.379393	0.337474	0.376156	0.342273
TGFBR3	0.0971451	0.0926383	0.204807	0.207698	0.112573	0.0838863	0.144984	0.131471
RNF220	2.23023	2.05829	2.21751	2.2905	2.4766	1.86414	2.36284	2.12082
PRDM2	0.0770776	0.0714726	0.0987197	0.0918786	0.115447	0.0546386	0.0719443	0.0610974
ZC3HAV1	0.130439	0.115338	0.113086	0.0909081	0.155206	0.241374	0.12855	0.13467
UBE4B	0.420506	0.346627	0.453079	0.346163	0.386579	0.340688	0.463803	0.428642
CTBS	1.61452	1.23927	2.12174	1.71787	1.64308	1.6038	1.59592	1.71776
SSX2IP	0.0246739	0.0256136	0.0242011	0.0230991	0.0297	0.0230768	0.0254544	0.0219439
IFI6	1.08091	2.15338	1.9965	2.32285	1.6814	3.43902	1.5521	0.978838
PER3	0.00825506	0.0241412	0.0111612	0.0124554	0.0139398	0.0187057	0.00708487	0.00499016
JUN	0.433732	0.365032	0.41256	0.504686	0.368855	0.369614	0.434587	0.396653
SMG7	0.274104	0.231596	0.112349	0.11129	0.176284	0.317547	0.274265	0.288213
S100A6	43.5101	34.6627	31.4577	28.1783	43.4482	35.9972	33.5618	24.9508
PPAP2B	0.03188	0.028589	0.0331521	0.0352633	0.0280713	0.0294727	0.0376156	0.0287574
CEP350	0.448327	0.383437	0.493598	0.423806	0.397118	0.440323	0.540495	0.48622
FIS1	1.20861	1.43559	1.49185	1.50435	1.44189	1.32418	1.62879	1.71457
PPM1J	0.0119949	0.0176688	0.025564	0.0259137	0.0176284	0.0168094	0.0198303	0.0149065
ARPC1B	4.92567	4.93867	4.45712	4.46453	4.24422	3.69614	3.8346	3.83858
ZEB1	0.00597465	0.00966261	0.0222488	0.0120025	0.00843096	0.00819579	0.0104447	0.00678149
TSPAN14	0.0460641	0.0444787	0.0349939	0.040116	0.0449332	0.0472463	0.0639099	0.0546998
NFKB2	0.0602026	0.0549081	0.0891424	0.0773204	0.0570048	0.0578526	0.0693879	0.070374
CALHM2	0.369425	0.429449	0.497282	0.520861	0.656274	0.284763	0.312976	0.268701
TFAM	0.425067	0.349694	0.280688	0.248784	0.478074	0.395326	0.489367	0.390256
ANK3	0.109003	0.109203	0.125241	0.124877	0.106824	0.106385	0.110655	0.0898868
ADD3	2.30777	2.08283	2.30223	2.12874	2.17481	2.59694	2.85221	3.02608
NOC3L	0.341148	0.380369	0.246062	0.245872	0.372208	0.316582	0.304942	0.268381
MAPK8	0.170118	0.157056	0.07846	0.0934962	0.15329	0.120526	0.19246	0.121875
TSSC4	0.298277	0.275461	0.379408	0.39469	0.483822	0.207627	0.252353	0.231594
GSTP1	8.30066	8.15953	5.74637	5.98505	10.0118	6.29951	7.66919	5.85384
RNH1	10.1706	9.75463	12.2663	12.7142	13.2692	8.29221	8.36307	7.61319
CCND1	0.00388124	0.00760738	0.00655676	0.00517626	0.00385621	0.00652449	0.00606231	0.00403051
APLP2	2.02044	1.53068	1.42554	1.07407	1.39877	1.27276	1.55575	1.30512
ZBTB44	0.211165	0.218406	0.31605	0.266577	0.340113	0.376042	0.348035	0.403051
PCSK7	0.0293716	0.0365032	0.0332258	0.0279195	0.0279276	0.0279942	0.0218024	0.0280536
CA3	0.00084831	0.00162577	0.00383091	0.00498215	0.00263947	0.00225625	0.00368852	0.00224877
TRIM29	0.00106267	0.00170553	0.00148448	0.00180199	0.00232331	0.00353544	0.000953171	0.00137549
FSHB	0.000834627	0.00275768	0.00504649	0.00263019	0.00184427	0.0041461	0.0027536	0.00118356
FAM111A	2.68175	3.02455	1.38871	1.19054	3.44903	2.63229	2.72804	2.27116
GANAB	0.51081	0.414112	0.475181	0.449688	0.236163	0.443537	0.544147	0.476624
TAF10	1.20861	1.21166	2.88792	2.7046	1.51374	1.27597	1.28915	1.19956
OS9	1.47314	1.36503	2.2654	1.97669	1.46105	1.04778	1.27089	1.20276
GOLGA3	0.84831	0.739266	0.67041	0.5888	0.732919	0.797081	0.755963	0.716535
MGP	0.00288243	0.00146319	0.007846	0.022355	0.00331011	0.00456393	0.00931259	0.00556594
RERG	0.0401807	0.0340492	0.021291	0.0180199	0.00919741	0.0411396	0.0580667	0.0441437
PTPRO	0.102618	0.118099	0.0884057	0.106437	0.109698	0.0996351	0.0894739	0.0694143
TXNRD1	0.0716046	0.0680984	0.0751448	0.0892905	0.135566	0.0520674	0.0419979	0.0419045
NANOG	0.024902	0.00515339	0.00124873	0.00201227	0.0414363	0.00736014	0.00203416	0.00195448
MDM1	0.149594	0.134663	0.110875	0.105466	0.182511	0.129204	0.111386	0.130192
BRF2	0.0538175	0.0634971	0.073303	0.0750558	0.0728129	0.0459607	0.0478411	0.0451033
NR2C1	0.0384476	0.0426382	0.0545168	0.0443217	0.0488613	0.0404968	0.038346	0.0403051
FARP1	0.0222567	0.0343559	0.0703562	0.078291	0.0372687	0.0300512	0.0430935	0.0534203
SLC7A8	0.0401807	0.0028589	0.00500966	0.00850848	0.0488613	0.00117955	0.00293986	0.00129872
MAP4K5	0.182888	0.160123	0.200018	0.202521	0.160955	0.25648	0.193556	0.198327
TPM2	0.0100338	0.0195706	0.0397826	0.0443217	0.0199756	0.0211805	0.0177487	0.0180093
TJP1	0.0041777	0.00886506	0.00116032	0.00221285	0.00190655	0.0118919	0.00781527	0.00591781
ARIH1	0.125422	0.116565	0.10535	0.0886435	0.104429	0.110563	0.134393	0.129872
CYP1A2	0.00371706	0.00322087	0.00153605	0.00158523	0.00332448	0.00504603	0.00679271	0.00543799
ANP32B	1.05811	1.46319	1.29662	1.17436	1.2886	2.69336	2.00129	1.94808
CDC14B	0.235794	0.242946	0.30942	0.397925	0.159997	0.252945	0.190269	0.173376
NOL3	0.119493	0.110123	0.139976	0.142671	0.117842	0.10767	0.117229	0.121235
MON1B	0.127703	0.14724	0.298738	0.268195	0.152332	0.160059	0.172374	0.160261
CHD9	0.0117669	0.0151227	0.0232802	0.0229697	0.0198798	0.0103813	0.0120516	0.00991633
PRKCB	5.701	5.39879	2.87318	3.42927	5.31726	3.95326	4.74759	3.96653
NQO1	0.000889357	0.00152148	0.00137029	0.00313811	0.00196882	0.00111206	0.000836307	0.00123154
CES1	0.0775337	0.0705524	0.0504649	0.0721442	0.0617951	0.117634	0.0916651	0.0614173
XPO6	0.560979	0.463192	0.655676	0.592035	0.785612	0.925642	0.653707	1.02362
IFNA10	0.000912161	0.00152148	0.0013445	0.00163052	0.00200235	0.00108634	0.000829003	0.00119636
APPBP2	0.579222	0.558284	0.438345	0.40116	0.522145	0.446751	0.518583	0.476624
AIM1L	0.00357111	0.00788346	0.00541485	0.00537037	0.0112093	0.00639593	0.00584319	0.00738927
KIAA0100	0.670438	0.665646	0.817753	0.779674	0.713758	0.494961	0.602579	0.524606
THRA	0.706925	0.598161	0.497282	0.540272	0.685016	0.427467	0.544147	0.550197
ARHGDIA	0.223479	0.218712	0.530434	0.524097	0.238558	0.174843	0.216929	0.211762
CPD	0.402719	0.306749	0.363568	0.264636	0.40095	0.279621	0.352418	0.358268
MBD1	0.205692	0.218712	0.275163	0.245872	0.303706	0.23366	0.208894	0.206963
BCL2	1.91098	2.05829	3.65042	4.10866	2.12211	2.33982	3.94416	4.89419
PVRL2	0.161909	0.147853	0.161709	0.208668	0.107303	0.164237	0.159957	0.153543
SPTAN1	0.538175	0.530676	1.816	1.85698	0.546096	0.424253	0.569711	0.604576
AXL	0.0656756	0.0868101	0.107929	0.114848	0.0689806	0.0919214	0.166166	0.16186
SAFB	0.206148	0.193252	0.211437	0.200257	0.249576	0.149131	0.13768	0.143947
LDLR	0.0211621	0.0275461	0.0342572	0.0449688	0.029221	0.0188664	0.01826	0.0221358
BAX	0.343885	0.256136	0.346992	0.303135	0.17341	0.271265	0.511279	0.435039
MAP2K2	0.488006	0.579756	0.537801	0.530567	0.680225	0.459607	0.482063	0.511811
COPE	1.09459	1.07976	3.62463	3.42927	1.36524	0.989923	1.02986	1.01403
ZNF91	0.269544	0.270553	0.762499	0.669679	0.352568	0.369614	0.376156	0.438238
GLI2	0.00953208	0.00984666	0.0265585	0.0101261	0.00675435	0.0130811	0.0252353	0.00870078
CUL3	0.0197939	0.0248467	0.02398	0.0260107	0.0222271	0.0198949	0.0211085	0.021624
CASP8	3.6304	2.6135	1.13454	0.879965	1.04429	3.19796	2.85221	2.34793
FZD7	0.00583783	0.00322087	0.00659359	0.00462628	0.00342029	0.00530316	0.00237014	0.00192569
SP100	0.474324	0.475462	0.736714	0.617916	0.536516	0.76494	0.587971	0.614173
TGOLN2	0.418682	0.450922	0.707245	0.566154	0.790403	0.469249	0.525887	0.531004
IL1RN	0.597465	0.711659	0.61884	0.482039	0.776032	1.19883	0.555103	0.511811
PTPN18	0.403175	0.334357	0.321576	0.287606	0.281192	0.264194	0.376156	0.313804
SUPT7L	0.665877	0.638039	0.563586	0.498215	0.713758	0.700659	0.723095	0.687746
ASXL2	1.54611	1.27608	1.32977	1.10643	1.25027	1.53952	1.78217	1.79454
CHRNA4	0.0248108	0.0198774	0.0210332	0.0237461	0.0156164	0.035033	0.0430935	0.0396653
SIRPA	1.74679	1.3497	1.45501	1.20025	1.83469	1.48167	1.39871	1.55463
SNAP25	0.000889357	0.00383437	0.00172023	0.00158847	0.00278318	0.00359972	0.00197208	0.0016218
PYGB	0.10125	0.0588959	0.0725663	0.0724677	0.0541306	0.0883859	0.150462	0.137229
TM9SF4	0.109459	0.0911046	0.0913525	0.0876729	0.0838306	0.0925642	0.109925	0.0937254
BCL2L1	0.368057	0.515339	0.699878	0.718206	0.632322	1.00278	0.814395	1.13878
EIF6	0.989694	0.812886	1.53973	1.60141	0.852677	0.713516	1.03717	0.83809
SON	3.18344	2.76688	2.95791	2.834	3.09934	2.27875	2.94351	2.9685
COL18A1	1.24054	0.644174	1.25241	0.905846	1.72452	0.700659	0.986039	1.46186
COL6A2	0.0102618	0.00904911	0.0957728	0.0456158	0.0186822	0.0102849	0.0149732	0.0222638
PRMT2	0.254949	0.203988	0.456763	0.462628	0.30179	0.270622	0.22825	0.278297
DGCR8	0.166469	0.195399	0.397826	0.423806	0.239995	0.207627	0.267326	0.316363
SMTN	0.0298277	0.0368099	0.0322312	0.0352633	0.01485	0.0456393	0.0511279	0.0454232
TMPRSS6	0.0124966	0.00861966	0.00729347	0.00731147	0.00651484	0.0168737	0.0235919	0.0214001
FBLN1	0.00670438	0.0103068	0.00585688	0.00303458	0.00375082	0.0124062	0.0135124	0.00940452
OPA1	0.276841	0.197853	0.162077	0.149465	0.194487	0.307583	0.398067	0.37746
MAP4	0.204324	0.154295	0.136292	0.134583	0.146105	0.154595	0.236649	0.200246
PLOD2	0.0606587	0.0521474	0.0880373	0.0860554	0.0483822	0.0890288	0.0726747	0.0502214
NKTR	0.474324	0.435584	0.854588	0.627622	0.541306	0.462821	0.544147	0.556594
DLG1	0.0948647	0.0975463	0.0972463	0.0912316	0.116405	0.0842077	0.0854567	0.0818897
MME	1.04442	0.941721	1.03877	0.647033	1.11135	0.944926	0.949519	0.97244
UBA7	0.203868	0.22086	0.419927	0.436747	0.263947	0.221768	0.206703	0.201525
MBNL1	0.040956	0.0530676	0.083617	0.0786145	0.0536516	0.0507817	0.0390764	0.0419045
OGG1	0.178327	0.150614	0.250483	0.219991	0.175805	0.126954	0.149367	0.146186
CBLB	0.23625	0.202455	0.405193	0.318987	0.21269	0.226589	0.258561	0.235113
ADD1	4.49239	4.50922	5.74637	5.62918	5.17355	4.46751	5.18583	5.08612
RUFY3	0.01838	0.0236811	0.026669	0.0173728	0.0323347	0.0161345	0.0150462	0.0141068
WDR1	0.96233	0.855831	1.2561	1.35877	1.0874	0.867789	0.880131	0.854084
PALLD	0.264071	0.163497	0.190441	0.257196	0.220834	0.140132	0.166531	0.227756
PRUNE	0.035255	0.0435584	0.0456763	0.0507921	0.0502984	0.03664	0.0372504	0.0302608
FBXL5	6.61317	5.46014	6.37258	6.34092	7.56871	6.65305	7.45007	7.99704
CSNK1A1	0.684121	0.610431	0.615156	0.569389	0.7425	0.700659	0.737703	0.639763
F2R	0.0734289	0.0677916	0.144028	0.179552	0.0819145	0.0752084	0.0934911	0.111639
PAM	1.0125	0.739266	0.814069	1.0676	1.32213	0.633165	1.18325	0.847687
IL4	0.0201131	0.0258283	0.0337783	0.0414101	0.0235205	0.0183843	0.0175661	0.0171457
UQCRQ	3.7353	3.19019	4.27294	4.33512	4.24901	3.31046	3.72504	2.93971
MAGI2	0.00397702	0.00849696	0.0126346	0.0145582	0.00512564	0.00562456	0.00595275	0.00415846
SYNPO	0.00158716	0.00426382	0.00128557	0.00158847	0.00243827	0.00319475	0.00189173	0.00364665
NIPBL	1.07179	0.947856	1.13454	0.899376	1.17363	0.935284	1.17594	1.02362
NPM1	5.38175	4.26382	5.19383	4.33512	4.27297	5.59242	6.50055	6.10974
NR3C1	1.62821	1.26381	2.11805	1.93463	1.58081	1.47203	1.53384	1.60901
EGR1	0.127703	0.150921	0.0607789	0.0860554	0.235684	0.16038	0.18333	0.209203
MARCKS	17.1486	14.4786	7.3303	6.53503	19.5924	14.8167	17.6757	19.7367
EFHC1	0.0258598	0.0290185	0.0343677	0.0336457	0.0298916	0.0232375	0.0225693	0.0183932
SPCS2	2.56773	2.40798	2.00755	2.27108	2.7688	2.08269	2.42858	2.21998
GSTA2	0.0243091	0.0208896	0.00994564	0.00828202	0.0152332	0.0266122	0.0304576	0.0239272
GPX5	0.0957769	0.0687119	0.0430978	0.038822	0.0363106	0.121169	0.157766	0.127313
FLOT1	1.19493	1.05829	1.71286	1.39759	1.25985	0.819579	0.785179	0.841289
SYNCRIP	0.469763	0.414112	0.471497	0.498215	0.424422	0.347116	0.412675	0.35187
SIRT5	0.229865	0.241719	0.166129	0.172434	0.245264	0.192842	0.223502	0.209203
ICA1	0.124966	0.180982	0.188967	0.184404	0.131255	0.199592	0.202321	0.213681
BAZ1B	0.20478	0.182209	0.295791	0.280489	0.213169	0.165844	0.203416	0.192249
IGFBP3	0.0312871	0.0200001	0.0423611	0.048851	0.0402387	0.0166808	0.0334523	0.0301009
EGFR	0.000884796	0.00144172	0.00131503	0.001582	0.00195924	0.00104135	0.000810743	0.00117397
CLU	1.12196	1.02454	1.29662	1.35553	0.89579	1.23419	0.945867	0.975639
CTSB	2.89611	3.22087	5.96738	5.75859	5.89209	6.74947	5.00323	7.61319
MYC	0.789019	0.699389	0.965095	0.779674	0.689806	0.851719	0.876479	0.921259
ANGPT1	0.0839188	0.0831291	0.0740398	0.0824967	0.0828725	0.0816365	0.107734	0.0809301
TERF1	0.302837	0.268712	0.427294	0.375279	0.278318	0.30694	0.372504	0.383858
IKBKB	0.12451	0.129755	0.193387	0.160141	0.179158	0.132097	0.130741	0.130512
COL14A1	0.00431908	0.0145399	0.001234	0.00307664	0.00412447	0.0121812	0.00358261	0.00585384
CHD3	0.0237162	0.0226688	0.025343	0.0229373	0.0230414	0.0290549	0.0288508	0.0302608
ECM2	0.000893918	0.00169326	0.00135187	0.00153023	0.00196882	0.0038247	0.00107369	0.00112278
HSD17B11	9.85134	7.66873	6.29891	5.33802	8.33516	9.19214	9.56823	8.76476
SLC1A1	0.000875674	0.00141105	0.00272584	0.00150435	0.0021796	0.00101563	0.000909347	0.00110999
RUSC2	0.124054	0.119939	0.125241	0.142994	0.101076	0.135311	0.190634	0.187451
PALM2	0.000875674	0.00300614	0.00139976	0.00155611	0.00194966	0.00359972	0.0025564	0.00227756
RAB14	0.811823	0.665646	0.799335	0.666444	0.843096	0.774582	0.920303	0.809301
SET	0.112196	0.127608	0.221751	0.204139	0.171014	0.161345	0.149732	0.158022
TRO	0.0332027	0.0271473	0.0309788	0.0300223	0.0293647	0.0388898	0.0555103	0.0489419
USP9X	4.3054	4.01842	4.34661	4.07631	4.27776	4.21039	4.27283	4.3184
CD99	12.8159	8.86506	12.8925	13.9112	10.8261	10.8313	10.6273	8.89271
TIMM8A	0.0985134	0.0950923	0.0762499	0.0776439	0.089579	0.106706	0.125994	0.110359
DDX3Y	0.957769	0.00193252	0.0222119	0.00152053	0.699387	0.00462821	0.00580667	0.00620571
DHCR24	0.00592905	0.01	0.0013445	0.00333222	0.00665854	0.0131775	0.0107369	0.0089247
FAM129A	0.665877	0.438652	0.88774	0.705266	0.809564	0.671733	0.617187	0.86688
PLEKHA5	0.0137736	0.0162577	0.0296527	0.0257519	0.0207421	0.0100921	0.0142063	0.0103642
SERPINA1	6.52195	6.13499	10.4245	8.9614	8.14354	7.00659	7.96135	7.13336
VPS4A	0.00579222	0.00895708	0.00965095	0.0115172	0.0102992	0.00880645	0.00639099	0.00620571
ITGAE	0.245827	0.225768	0.2107	0.188934	0.312329	0.273514	0.232632	0.240231
ILF3	0.519932	0.527609	0.423611	0.404395	0.457476	0.469249	0.500323	0.457431
LHB	3.49358	7.76076	17.3128	21.158	4.88613	8.32435	13.9871	19.8007
AP2A2	0.132719	0.128221	0.216594	0.171787	0.156164	0.133061	0.157401	0.13627
BCL11A	0.0328834	0.0404909	0.0390458	0.0378514	0.0308018	0.0401754	0.0312976	0.029845
WFDC2	0.0169206	0.0154602	0.010093	0.00773204	0.0100118	0.0166487	0.0202686	0.0164739
DDX17	0.322905	0.2727	0.622523	0.433512	0.262031	0.395326	0.32941	0.419045
TREX1	0.314239	0.463192	0.858272	0.802321	0.555677	0.520674	0.318454	0.240231
EIF4G1	0.921282	0.953991	1.27452	1.46553	1.34608	0.954568	1.3695	1.73056
PCDHGC3	0.000857431	0.00140491	0.00128557	0.00159817	0.00187781	0.00102528	0.000796135	0.00117397
FGFR1	0.00415033	0.00552149	0.00265217	0.00372044	0.00283587	0.00835649	0.00617187	0.00802903
RXRA	1.20861	1.13804	1.64656	1.26495	1.72452	1.70344	1.49732	1.83932
CSPG4	0.0013728	0.00576689	0.00303526	0.00158847	0.00406219	0.0038247	0.00206703	0.00479823
KRR1	0.321537	0.289571	0.273689	0.229373	0.28215	0.395326	0.405371	0.403051
SLC4A4	0.0126334	0.0104602	0.0318997	0.0277577	0.0156643	0.0155881	0.0170913	0.0110359
HEPH	0.00129071	0.00460124	0.00880373	0.00954373	0.00502984	0.00466035	0.00409023	0.00438238
H3F3A	89.3918	92.0248	53.0434	55.9683	47.52	48.5319	54.0495	66.2155
CEP170	0.0376266	0.0509204	0.0674093	0.059527	0.0594	0.0514246	0.0412675	0.0479823
GADD45A	0.465202	0.533744	0.486231	0.621151	0.617951	0.678161	0.496671	0.483021
PKN2	1.86537	1.67485	1.5471	1.19054	1.42752	1.76772	1.85521	1.84572
USP33	0.0318344	0.0500002	0.0880373	0.0873494	0.0967645	0.038247	0.0245779	0.0226476
EFHD2	13.2719	10.5522	9.17209	10.4172	14.3231	9.44926	11.5403	10.5241
CBX5	0.0377178	0.0444787	0.068146	0.0549978	0.0512564	0.0446751	0.0359356	0.0483021
SLC39A1	0.0647634	0.0779143	0.0486231	0.050145	0.0996387	0.0430681	0.0463803	0.0428642
MAP3K8	0.204324	0.211964	0.292107	0.27693	0.242869	0.222733	0.23738	0.229035
DHCR7	0.367145	0.273927	0.375724	0.39469	0.335801	0.209234	0.324662	0.287574
THYN1	0.519932	0.447854	0.493598	0.439982	0.59879	0.482105	0.566059	0.451033
COPS7A	0.119493	0.130368	0.0799335	0.0757028	0.0938903	0.134668	0.123072	0.111959
CD44	5.1081	4.17179	4.01509	3.72044	5.41306	4.66035	4.63803	4.63829
ST5	0.0125422	0.0135276	0.0138871	0.0147847	0.00795193	0.0163273	0.0177852	0.0201525
CDK4	0.291891	0.28497	0.637258	0.611446	0.369334	0.234625	0.265135	0.237672
HSPBAP1	0.45608	0.319019	0.548852	0.478804	0.589209	0.385684	0.518583	0.572588
CCR3	0.665877	0.996936	1.42923	1.83757	0.737709	0.601024	0.587971	0.774114
GJB1	0.00390861	0.00914113	0.00120821	0.00266901	0.00183948	0.0106706	0.00697531	0.00630167
ATP6AP1	2.12533	1.6043	1.5692	1.39759	1.80116	1.34025	1.5521	1.39788
GPX1	67.0438	73.6199	54.5168	62.1151	66.5854	93.8498	65.7359	71.0137
CBX7	1.21773	1.06442	1.15296	1.03202	1.30776	0.880645	1.28915	1.21555
CRBN	0.84831	0.898776	0.692511	0.698795	0.886209	0.838863	0.810743	0.72933
NF2	0.944086	0.837426	0.920893	0.944668	1.07303	0.89993	0.902043	0.860482
SEC16A	0.425523	0.411044	0.526751	0.533802	0.493403	0.296977	0.368852	0.358268
GSK3B	0.28505	0.279755	0.655676	0.530567	0.36598	0.269979	0.31115	0.314764
PCOLCE	0.0238986	0.0178528	0.0307946	0.031187	0.0205505	0.0265158	0.0394416	0.0374262
KLHL24	0.085287	0.0950923	0.142923	0.120348	0.0924532	0.0819579	0.0869175	0.0978838
RPL10A	30.5574	27.8835	32.5996	33.3222	32.0472	26.0015	27.4265	22.4877
TBC1D9B	0.560979	0.552149	0.861955	0.931727	0.694596	0.578526	0.606231	0.566191
WDR45	1.55979	1.85277	3.86775	3.97925	2.64905	3.13368	2.85951	3.19562
PPARG	0.0014777	0.00389572	0.00408876	0.0039469	0.00289814	0.00475677	0.00368852	0.00158981
RECQL	0.757093	0.714726	0.869323	0.928492	0.919741	0.768154	0.821699	0.790108
ID1	0.0122686	0.0142025	0.0251588	0.0307988	0.0156164	0.0184486	0.0109925	0.0119636
DERA	1.54155	1.52454	0.762499	0.769969	2.02152	1.5813	1.30741	1.27633
CLTB	0.000985134	0.00163497	0.00197808	0.0017664	0.00216043	0.00119883	0.00125263	0.00180093
ZNF195	0.13728	0.14908	0.277373	0.28243	0.172452	0.182236	0.196112	0.204724
ANAPC2	0.011174	0.0788346	0.0229855	0.019411	0.014371	0.0601024	0.0163975	0.0131471
STK24	1.7924	1.58896	1.97808	1.90875	2.27061	1.61987	1.58497	1.39149
GSTA3	0.0373074	0.0270246	0.0128557	0.012326	0.0045029	0.0485319	0.0726747	0.0556594
SGSH	0.333395	0.325154	0.405193	0.362338	0.335322	0.273514	0.390764	0.323081
DNAJC2	0.4538	0.441719	0.372041	0.329987	0.613161	0.514246	0.529539	0.483021
ARF5	0.385388	0.309817	0.348097	0.273695	0.2376	0.310476	0.409023	0.318922
CEP290	0.0939526	0.0947856	0.0987197	0.098996	0.0934112	0.116027	0.0964127	0.126673
ZYX	1.00338	0.926383	1.43659	1.35553	1.30776	0.880645	0.843611	0.985236
IL1RAPL2	0.0115844	0.00690186	0.00545168	0.00384984	0.00286461	0.0126633	0.0188078	0.013531
RAD23B	2.92348	2.7178	2.29855	2.46519	5.41306	2.72872	2.51622	2.41511
MLEC	0.73885	0.831291	1.10139	1.14201	0.867048	0.809937	0.810743	0.706939
IFT74	0.012223	0.0141105	0.030942	0.0303782	0.0251013	0.0258087	0.0154845	0.0221038
GSN	1.81976	1.4816	1.80863	1.7114	1.6814	1.14098	1.7347	1.38189
MYO6	0.0647634	0.0349694	0.0710929	0.129407	0.0737709	0.0340688	0.0569711	0.0735728
EEF1A2	0.0196115	0.0169326	0.0142554	0.00779674	0.0132692	0.0282514	0.03484	0.0318282
ADRA2C	0.01838	0.0286504	0.00895108	0.0125524	0.0168619	0.0262587	0.0105177	0.013595
CDC42BPA	0.0615709	0.0920248	0.111981	0.0905846	0.117842	0.154916	0.133663	0.167298
PSIP1	0.121773	0.107976	0.113454	0.0905846	0.125027	0.120205	0.124168	0.124754
INTS6	0.743411	0.690186	0.56727	0.507921	0.804774	0.745656	0.912999	0.662155
SMARCA5	0.0766215	0.0822088	0.116401	0.0999666	0.102992	0.0960996	0.0993343	0.0982037
TNFRSF10C	11.2652	9.72396	11.7874	9.28492	13.2213	8.03509	8.94739	9.94832
CKB	0.0246283	0.0281289	0.0364305	0.0439982	0.0333885	0.0198627	0.0214007	0.0211442
RDH11	0.271824	0.243866	0.390458	0.365573	0.231372	0.5496	0.345479	0.332677
BRD2	0.0460641	0.0503069	0.056727	0.0511156	0.0589209	0.0527102	0.0409023	0.0390256
PCSK5	0.56554	0.447854	0.416243	0.329987	0.488613	0.494961	0.423631	0.403051
ATXN7	0.184256	0.151841	0.246431	0.182787	0.162392	0.168737	0.170913	0.182013
NDUFS4	0.898478	0.717794	1.06824	0.915551	0.737709	0.826007	1.05543	0.847687
GRK6	0.96233	0.865033	1.41817	1.3523	0.867048	0.655663	0.814395	0.86688
HSPB1	1.18125	1.92025	4.34661	6.40562	1.50416	1.76129	2.12911	2.56865
SHB	0.0258598	0.0227608	0.00699878	0.00925257	0.0102034	0.035033	0.0427283	0.0428642
MAPK1	1.33632	1.0951	1.5029	1.34259	1.57122	1.20205	1.39871	1.46506
TH	0.00395422	0.0114111	0.00215857	0.00527332	0.00406698	0.0117634	0.00628143	0.00572588
ALDH1L1	0.00674999	0.00705524	0.00445712	0.00329987	0.00428734	0.00662091	0.00872827	0.00726132
IARS	0.433732	0.475462	0.99088	1.06437	0.522145	0.427467	0.482063	0.451033
BAP1	0.118125	0.126074	0.168708	0.164346	0.126464	0.104456	0.107003	0.116117
RPS4Y1	4.14577	0.00164111	0.0777233	0.00170817	4.64661	0.00118919	0.00100065	0.00399852
PEX3	0.0588344	0.0680984	0.0559903	0.0533802	0.0637113	0.0668519	0.0781527	0.0764517
TAPBP	0.084831	0.0877303	0.0895108	0.0708501	0.0886209	0.0755298	0.0978735	0.0975639
SATB1	3.17888	2.7178	2.38327	2.07698	2.7209	2.67729	2.51257	3.00049
GBP1	1.0125	1.42945	1.5029	1.47523	2.99874	2.09876	1.58862	0.895669
TRMT61B	0.0275016	0.0334357	0.0460446	0.0472334	0.0478553	0.0250052	0.0300924	0.0237672
PIK3CD	0.128159	0.123927	0.121558	0.116466	0.169577	0.0999565	0.0938563	0.121235
HSP90B1	15.4611	19.7853	33.2258	37.2044	21.269	24.6516	27.0978	33.2677
ASL	0.096233	0.11135	0.310525	0.346163	0.13844	0.0835649	0.0949519	0.100123
PYCARD	3.80827	3.37424	7.66183	6.9556	4.29692	2.99869	3.49496	2.82456
RPL23	56.0979	45.7057	24.7904	24.2637	43.7356	40.4968	57.3363	43.184
TP53	0.00816384	0.0109816	0.0194493	0.0152376	0.00982016	0.00861361	0.00500323	0.00793307
CLCC1	0.0067956	0.0117178	0.0122663	0.0119054	0.0089579	0.00575312	0.00518583	0.00543799
SOX9	0.00866553	0.0115338	0.007846	0.00708501	0.00526935	0.0116669	0.0151923	0.0158661
NAGLU	0.130439	0.113191	0.207385	0.23552	0.134129	0.0954568	0.140237	0.131152
VAT1	0.404543	0.306749	0.401509	0.427042	0.337239	0.230125	0.324662	0.29781
PFN1	2.46739	2.2362	2.40537	2.31638	2.4239	1.84486	2.73534	2.88213
RNASEH1	0.040728	0.0472394	0.0777233	0.0850848	0.0680225	0.0572098	0.0416327	0.0441437
COLEC12	0.00174223	0.00219326	0.00453079	0.011226	0.00227061	0.00191556	0.00160688	0.00326279
MAN2B1	7.25168	6.04296	8.58272	7.73204	8.14354	4.88533	5.62407	4.57431
IRF3	0.183344	0.194786	0.269637	0.246843	0.260114	0.143989	0.155575	0.169537
SEPW1	2.16182	1.95093	2.42011	2.67548	2.7209	1.63273	1.88078	1.70817
SUPT5H	0.419138	0.361964	0.500966	0.443217	0.401429	0.353544	0.427283	0.396653
PLEKHJ1	0.615709	0.552149	0.615156	0.637327	0.627532	0.440323	0.471107	0.403051
SAFB2	0.320625	0.303375	0.386775	0.352633	0.336759	0.265158	0.336714	0.303568
GPX4	0.633952	0.831291	1.97808	2.08021	0.89579	0.954568	0.825351	0.72933
SNX17	0.342972	0.337424	0.56727	0.5888	0.413405	0.259373	0.281204	0.287574
ACTR1B	0.138648	0.14908	0.159867	0.154317	0.15856	0.13274	0.158497	0.178494
OLA1	0.338412	0.312884	0.305	0.258813	0.353526	0.359972	0.38346	0.319882
VAMP8	7.11485	6.47241	7.99335	9.05846	6.89806	5.30316	5.44147	5.05413
OGFR	18.6081	27.5768	49.7282	56.2918	25.9635	30.7583	29.8003	37.4262
C20orf27	0.0218463	0.029724	0.0434661	0.0456158	0.0340113	0.0286692	0.0210355	0.0199606
PCNA	0.454256	0.438652	0.486231	0.456158	0.488613	0.462821	0.514931	0.476624
PLCB4	0.00309223	0.00278222	0.00640941	0.00404395	0.00517355	0.00655663	0.00478411	0.00113558
TMPRSS2	0.062483	0.0573621	0.0268164	0.0365573	0.0234726	0.0707088	0.0953171	0.0895669
PFKL	0.141841	0.144786	0.163919	0.172758	0.184427	0.128883	0.303846	0.390256
SLC19A1	0.355287	0.284357	0.275899	0.225814	0.329574	0.206662	0.272074	0.276058
APOL3	1.10828	1.17178	1.95229	1.71464	1.60476	1.39489	1.23072	0.978838
CSNK1E	0.021755	0.0276381	0.0497282	0.0527332	0.0287419	0.0204413	0.0230076	0.0238312
RRP7A	0.043054	0.0414112	0.0593055	0.068909	0.0351609	0.053353	0.0821699	0.0940452
SAMM50	0.45608	0.411044	0.688828	0.692325	0.414842	0.324617	0.412675	0.345472
RYBP	0.588344	0.496934	0.659359	0.507921	0.522145	0.504603	0.598927	0.588582
SEC13	4.60641	3.83437	3.90458	3.78514	4.50769	3.88898	3.8346	3.23081
ARPC4	0.132263	0.10951	0.194124	0.162729	0.118321	0.148488	0.158862	0.151304
AKT1	0.016054	0.0176994	0.0280688	0.0234549	0.0238558	0.014656	0.0154845	0.0179134
VILL	0.0244915	0.0309817	0.0703562	0.0604976	0.0411488	0.0215019	0.0197208	0.0186491
HLA-G	0.0181976	0.0199694	0.0356938	0.0267548	0.0313287	0.00919214	0.0108099	0.013595
PLA2G12A	0.249476	0.209203	0.427294	0.397925	0.220355	0.273836	0.251988	0.232874
OBSL1	0.00560979	0.00619634	0.00666726	0.0050145	0.00656274	0.0101563	0.00807091	0.00658956
SORBS3	0.12223	0.152148	0.340362	0.29537	0.209337	0.125347	0.190634	0.187131
IL2	0.00084831	0.00142025	0.00127452	0.00154964	0.00187302	0.00101563	0.000785179	0.00114518
DYNLRB1	0.000880235	0.0014724	0.00131503	0.00161111	0.0019305	0.00105099	0.000810743	0.00118676
PCYOX1L	0.247196	0.269939	0.5157	0.549978	0.29173	0.266443	0.28449	0.272859
GPX2	0.0893918	0.0742334	0.115296	0.126171	0.0565258	0.118276	0.196477	0.211762
MON2	0.2513	0.242025	0.225066	0.188934	0.344424	0.246516	0.249431	0.225197
PPP2R5E	0.770776	0.745401	0.869323	0.799085	0.857467	0.832435	0.916651	0.818897
CHRNE	0.0245827	0.0281903	0.0337047	0.0436747	0.0439751	0.033426	0.0354974	0.0342273
HMGCR	1.08547	0.880371	0.666726	0.5888	0.886209	0.700659	0.792483	0.738927
TOP1	0.579222	0.613499	0.453079	0.436747	0.75208	0.678161	0.628143	0.556594
MUC5AC	0.00158716	0.00277608	0.00445712	0.00157552	0.00378914	0.0039854	0.00423631	0.00264222
GALNT1	0.292348	0.267485	0.228013	0.23649	0.330053	0.252302	0.263309	0.248868
HLA-E	8.39188	9.60126	10.8297	11.4525	10.0597	6.10667	6.35447	7.77313
HLA-DPA1	9.25843	11.5338	15.7288	18.5375	11.401	7.36014	8.69175	8.28494
RANBP3	1.4777	1.31902	1.36292	1.32965	1.83469	1.36596	1.31472	1.31791
ACOT2	0.465202	0.411044	0.427294	0.520861	0.393764	0.296334	0.416327	0.329478
CLASP1	0.0506249	0.0539879	0.083617	0.078938	0.0608371	0.0691017	0.0507627	0.0607775
FAM21C	0.164645	0.175461	0.430978	0.349398	0.284545	0.347116	0.20159	0.221678
YLPM1	0.280946	0.242639	0.242011	0.227756	0.260593	0.206662	0.223137	0.204724
PEF1	0.40956	0.475462	0.674093	0.637327	0.594	0.469249	0.536843	0.553395
ZNF12	0.260422	0.225461	0.379408	0.321575	0.251971	0.310476	0.368852	0.35187
UGCG	0.132719	0.102148	0.169813	0.116142	0.151853	0.120205	0.177487	0.148745
TRA2A	0.180608	0.155829	0.120821	0.0786145	0.0958064	0.151381	0.161053	0.154503
PON2	0.0620269	0.0812886	0.0931943	0.0967314	0.0948483	0.071673	0.0697531	0.0767716
CXCL2	0.00825506	0.0142945	0.0202596	0.0187639	0.0142752	0.00960996	0.00796135	0.00706939
RFTN1	0.84831	0.855831	1.38134	1.81169	1.08261	0.758512	0.975083	0.860482
UQCRB	2.66351	1.92639	2.12174	1.82463	1.13531	3.20439	4.63803	4.3184
GMPR2	0.0884796	0.0846628	0.102403	0.106113	0.12359	0.0742442	0.0690227	0.0719734
GRINA	0.268631	0.368099	0.331153	0.311546	0.404303	0.485319	0.511279	0.614173
SYNJ2	0.0843749	0.0776076	0.0854588	0.079585	0.0776032	0.0928856	0.0807091	0.0834891
DNAJB3	0.00178327	0.00141105	0.00120821	0.00152376	0.00186343	0.00102528	0.00254544	0.00110999
EEF1D	33.3395	25.5215	23.3538	23.1961	29.6042	27.6086	26.8422	21.656
VPS28	8.20945	8.37426	12.0453	12.973	11.6884	9.86709	9.16651	8.9247
ASS1	0.00716046	0.00898776	0.00814069	0.00575859	0.00627532	0.010542	0.00942215	0.0059498
UHRF1BP1L	0.205236	0.192025	0.192651	0.151082	0.239995	0.195413	0.198303	0.176255
EYA2	0.00332939	0.00148773	0.00234643	0.00154641	0.00194008	0.00303726	0.00215103	0.00129552
LPIN1	0.0135912	0.0233436	0.0302053	0.0308311	0.0229935	0.0189307	0.0195382	0.0205044
COG4	0.0357567	0.0380369	0.0740398	0.0711736	0.0473284	0.0321403	0.0430935	0.0412647
PLA2G2A	0.0211165	0.0178528	0.0145869	0.0143641	0.0156643	0.0324617	0.0394416	0.0332677
CRAT	0.029782	0.0283436	0.0401509	0.0423806	0.0323347	0.028862	0.0445543	0.048622
SMG5	0.347077	0.267179	0.317155	0.2999	0.377956	0.248766	0.249796	0.263263
CIZ1	0.32929	0.290798	0.445712	0.469099	0.329095	0.337474	0.474759	0.527805
SRRM2	2.22111	1.79142	1.80127	1.60464	1.41314	1.26954	1.54114	1.51624
PPP1CA	1.52787	1.43865	1.62445	1.69523	1.4371	1.01885	1.21611	1.13238
SELENBP1	6.20269	14.1105	12.3768	11.9701	17.6284	30.1155	17.8217	22.1678
IQCK	0.0193378	0.0239265	0.0352518	0.0322869	0.0240953	0.0196378	0.0242858	0.0201206
EXOSC4	0.19201	0.194172	0.346256	0.342927	0.214606	0.174201	0.207799	0.18841
RECQL5	0.00084831	0.00147853	0.0015913	0.00158523	0.00189697	0.0010767	0.000898391	0.00116437
STAB1	0.0643073	0.0521474	0.0637258	0.0731147	0.075208	0.0395326	0.0379808	0.035187
PTOV1	0.0474324	0.0542946	0.0648308	0.0634092	0.0670645	0.038247	0.0390764	0.0470226
SKI	0.0336131	0.0303375	0.0362832	0.0273695	0.0399034	0.0269015	0.0278647	0.0282775
RBBP4	1.7103	1.16565	1.09402	0.944668	1.14968	1.5813	1.98303	1.65059
COG7	0.0501688	0.0570554	0.100193	0.0957608	0.0589209	0.0475677	0.0598927	0.0607775
SPSB3	0.329746	0.349694	0.460446	0.420571	0.488613	0.301798	0.275726	0.319882
NFKBIB	0.037581	0.0438652	0.0640941	0.0608211	0.0498193	0.0491747	0.0412675	0.0489419
MED13L	45.3344	39.5707	44.9396	37.2044	15.3769	46.6035	36.8852	33.9075
RANGAP1	0.0237618	0.0368099	0.041256	0.040116	0.0372208	0.0266765	0.0223502	0.0205364
TLR10	0.0192466	0.0210737	0.0383091	0.0417336	0.0175805	0.0181272	0.0134028	0.0122515
MAZ	0.0273192	0.0312884	0.0375724	0.0352633	0.0381309	0.0266765	0.0345114	0.037746
KLK3	0.0592905	0.0450922	0.0144396	0.0154317	0.0365501	0.0787438	0.0865523	0.0742126
PML	0.0159172	0.0181289	0.0194493	0.0186669	0.0287898	0.0219519	0.0185156	0.019001
SHANK2	0.00224848	0.00392639	0.00126715	0.00159494	0.00182511	0.0051746	0.00106273	0.00117716
ADCY2	0.00579222	0.00760738	0.00238327	0.00566154	0.00526935	0.0104456	0.00624491	0.00553395
ZCCHC24	0.0137736	0.0177301	0.0394142	0.0637327	0.0279276	0.0207627	0.0153019	0.016346
TOB2	0.0175135	0.0156442	0.0196703	0.0200257	0.0246222	0.013049	0.0145715	0.0143307
RPS6KA2	0.262702	0.280369	0.405193	0.491745	0.251492	0.278014	0.489367	0.508612
SERBP1	0.360304	0.328222	0.263375	0.262695	0.352568	0.310797	0.339636	0.310285
SLC25A6	1.68294	1.55829	2.02965	1.80522	1.68619	1.17634	1.3768	1.15157
PPFIBP1	0.00114932	0.00144479	0.0012561	0.00154641	0.00192571	0.00105099	0.00166896	0.00112918
STAG2	1.23598	1.13191	1.18611	0.938197	1.45147	1.08634	0.989691	0.998031
PTPN1	0.519932	0.490799	0.976146	1.01584	0.512564	0.443537	0.555103	0.483021
PHLDA1	0.00312871	0.00242025	0.00144396	0.00179552	0.0032191	0.00430681	0.00340001	0.00293971
MAGED2	0.26179	0.275154	0.328206	0.359103	0.269216	0.271265	0.218389	0.208243
ZNF573	0.492567	0.411044	0.303158	0.246196	0.44023	0.440323	0.460151	0.476624
RPL39	28.8699	19.1718	33.4837	33.9692	15.9997	25.9051	23.8475	17.7534
GRIA2	0.000866553	0.00346627	0.00344414	0.00329987	0.00192571	0.00104135	0.00104812	0.00126993
FAM50A	0.440574	0.438652	0.604106	0.614681	0.579629	0.401754	0.412675	0.43184
IDH3G	0.178327	0.205522	0.5157	0.527332	0.225145	0.165844	0.178583	0.172416
RBBP6	0.0196571	0.0287424	0.0497282	0.0410866	0.0387058	0.035033	0.0335618	0.0275098
PIGK	0.524492	0.457057	0.273689	0.251049	0.430171	0.35033	0.441891	0.425443
GPRIN2	0.0661317	0.0634971	0.061884	0.0627622	0.0419153	0.0835649	0.121246	0.10716
AGRN	0.0934965	0.103988	0.160972	0.19961	0.0799983	0.155559	0.209259	0.247588
SOS1	0.00948647	0.0102454	0.0129662	0.0165964	0.0101555	0.00967424	0.00916651	0.00796506
MYL6	19.5658	21.0123	24.0169	23.5196	21.5564	21.7912	18.6617	16.4739
SDCCAG8	0.0450607	0.0555216	0.0795651	0.068909	0.0656274	0.0700659	0.0551451	0.0614173
FOXO3	0.437381	0.515339	0.585688	0.511156	0.670645	0.896716	0.650055	0.700541
HERC2P2	0.127703	0.139571	0.236117	0.219344	0.179637	0.234946	0.190269	0.224877
NASP	0.164645	0.173927	0.214384	0.191845	0.199277	0.171629	0.158862	0.140748
LMNA	0.711485	0.641106	1.24505	1.42994	0.685016	0.578526	0.518583	0.479823
EVI5	0.00150963	0.00138037	0.00394142	0.00527332	0.00541306	0.00261301	0.00182235	0.00508612
MRPL9	1.54611	1.53681	1.75338	1.82787	1.7341	1.34025	1.49732	1.31152
RCHY1	1.16301	1.01227	0.718296	0.647033	1.19279	0.999565	1.0116	1.02362
RABGAP1	0.00898478	0.0197547	0.0135187	0.00815261	0.0090537	0.0113455	0.00452847	0.00591781
KPNA1	0.0369881	0.0420247	0.0777233	0.0702031	0.0555677	0.0424253	0.0362278	0.0387057
PLEKHO1	10.3074	10.1841	11.3822	10.6437	11.7842	8.22793	9.96995	7.54921
SF3B4	0.00280033	0.00429449	0.00666726	0.00627622	0.00302748	0.00568884	0.00430935	0.00264222
NEK2	0.00652195	0.0153375	0.0127452	0.00964079	0.00723338	0.0127919	0.00777875	0.00930856
POLR2C	0.243547	0.215952	0.405193	0.375279	0.251492	0.195092	0.249066	0.257825
TAF5L	0.0215726	0.0117178	0.0278478	0.0206727	0.00919741	0.0305012	0.0624491	0.0393455
LITAF	3.88124	2.70246	4.82548	4.04395	3.57358	3.8247	3.79808	4.54232
SMURF1	0.00285506	0.00262577	0.0106824	0.0115172	0.0031664	0.00501389	0.00398067	0.00306767
IRF9	0.0807262	0.108589	0.139976	0.108702	0.125506	0.104778	0.0712139	0.0790108
NAV2	0.00139105	0.00148467	0.00127452	0.00155935	0.00194487	0.00331046	0.00279743	0.0016218
KLF12	1.09915	0.815953	0.626207	0.627622	0.689806	0.777796	1.01891	0.962844
TNPO2	0.00825506	0.012362	0.0168708	0.00711736	0.0128381	0.0118919	0.0163244	0.00818897
FBXO11	0.0199307	0.0292639	0.0456763	0.0436747	0.0381789	0.0286692	0.0230441	0.0223597
HLF	0.00775337	0.0112577	0.0126346	0.00867024	0.0131255	0.00691017	0.00529539	0.00700541
SLC35D1	0.00588344	0.0120246	0.0117874	0.0119378	0.00799983	0.00668519	0.00533191	0.00582185
SLC6A2	0.00173767	0.00677916	0.00134082	0.00163699	0.00202631	0.00111206	0.00164705	0.00120276
HIST1H4F	0.0729729	0.0932518	0.0766183	0.0692325	0.074729	0.130168	0.0975083	0.0582185
NFAT5	0.916722	0.779143	0.648308	0.517626	0.541306	0.842077	0.814395	0.844488
SSRP1	2.02956	1.76994	2.34643	2.32285	1.76284	1.36596	1.6507	1.47785
B3GAT3	0.0538175	0.0521474	0.101298	0.122936	0.0737709	0.0437109	0.0551451	0.0738927
CXCL9	0.0216182	0.0423314	0.0644625	0.059527	0.059879	0.0417824	0.0544147	0.0323081
SPG7	0.469763	0.392639	0.659359	0.553213	0.498193	0.324617	0.438239	0.40625
CSNK2A1	0.0285506	0.0371167	0.035878	0.0362338	0.0135566	0.0104778	0.00934911	0.00930856
SELK	5.1081	6.31904	5.48852	4.36747	8.09564	12.7276	10.3351	9.7244
RNF40	0.0474324	0.0518406	0.190441	0.0452923	0.0699387	0.0478891	0.214007	0.0511811
RBMS1	0.62483	0.585891	1.10875	0.954373	0.656274	0.694231	0.715791	0.722933
PRKAG1	0.0428259	0.0493867	0.0427294	0.0404395	0.023281	0.0404968	0.0507627	0.0511811
PPP1R14B	0.734289	0.674849	0.906158	0.786145	0.728129	0.511031	0.584319	0.658956
SF3B1	0.0560979	0.0647241	0.0607789	0.0475569	0.0512564	0.0665305	0.0650055	0.0662155
TFEB	0.775337	0.653376	0.854588	0.815261	0.809564	0.507817	0.606231	0.598179
EPB41L4B	0.0366689	0.0343559	0.0167971	0.0160788	0.0113531	0.0530316	0.0697531	0.0642962
DICER1	1.44577	1.17485	1.17874	0.947903	1.70535	1.29847	1.5521	1.53863
SCARA5	0.253581	0.219019	0.221014	0.239079	0.120237	0.24041	0.347305	0.310925
LIME1	0.389949	0.398774	0.791968	0.78938	0.526935	0.417824	0.671967	0.770915
GOLGA8A	0.09076	0.0960126	0.162077	0.0934962	0.147063	0.134668	0.116133	0.141068
TNF	0.223023	0.20951	0.193019	0.215138	0.269695	0.210841	0.27536	0.250148
STUB1	0.693242	0.622701	1.40344	1.33936	0.809564	0.478891	0.547799	0.527805
MAPK3	0.0976012	0.0990801	0.099088	0.102555	0.104908	0.108956	0.144254	0.151624
SLC7A5	0.0474324	0.0411044	0.0401509	0.0384984	0.0347777	0.0629951	0.0887435	0.0738927
C11orf30	0.280489	0.220246	0.298738	0.245872	0.213648	0.248445	0.303116	0.246309
R3HDM1	0.0729729	0.0739266	0.0961412	0.0854083	0.0804774	0.0935284	0.0964127	0.0886072
CAPN7	0.0839188	0.0849696	0.113086	0.0967314	0.104429	0.0771368	0.0912999	0.067495
KRT7	0.00469763	0.00503069	0.00423611	0.00158523	0.00185385	0.00536744	0.00242127	0.00626968
PRPF8	0.606587	0.561351	1.41081	1.35553	0.680225	0.475677	0.617187	0.646161
PYCRL	0.130439	0.0868101	0.0766183	0.0805556	0.0871838	0.117955	0.186252	0.16218
TAX1BP3	0.0253581	0.0334357	0.0563586	0.0679384	0.0261072	0.0312083	0.0409023	0.0302928
PAOX	0.238074	0.213498	0.296896	0.342927	0.234726	0.162309	0.203051	0.165059
DOLPP1	0.09076	0.0957058	0.164287	0.166934	0.122153	0.0797081	0.0927607	0.078371
TUBB	0.200675	0.211657	0.295422	0.307988	0.251971	0.225304	0.242492	0.222958
SMCHD1	3.30658	3.49694	4.23611	3.16723	5.70048	4.56393	3.98067	3.7746
ZNF552	0.0223023	0.0213804	0.0279583	0.0251049	0.0308976	0.0236553	0.0184426	0.0195128
ZKSCAN1	0.199307	0.190185	0.497282	0.443217	0.225145	0.207305	0.251622	0.264862
RABAC1	4.04543	3.43559	5.96738	5.59683	4.26338	2.7255	3.26123	2.78937
GPR107	0.0124054	0.0177915	0.0190441	0.0191522	0.0241911	0.0191556	0.0178217	0.0143307
HIST4H4	0.0022804	0.00407977	0.00325996	0.00159494	0.00318556	0.00527102	0.00489367	0.00277657
CCDC101	0.029554	0.0349694	0.114191	0.105143	0.0457955	0.0331046	0.0303481	0.0326279
RALGPS1	0.0257685	0.0306749	0.0504649	0.0556448	0.0369813	0.028862	0.0327219	0.0367864
SMARCA4	1.85625	1.69326	1.55447	1.55288	1.95924	1.49453	1.66531	1.6218
DUSP8	0.10125	0.102761	0.116032	0.113554	0.104908	0.0877431	0.0986039	0.0886072
PRMT1	0.369881	0.319019	0.36762	0.322869	0.347777	0.310476	0.441891	0.387057
RUVBL2	0.129527	0.135276	0.192282	0.203815	0.137003	0.102528	0.113577	0.110679
DR1	0.444222	0.435584	0.486231	0.475569	0.550887	0.385684	0.445543	0.412647
MACF1	0.474324	0.365032	0.707245	0.659973	0.60358	0.353544	0.503975	0.582185
PDE8A	0.0136368	0.0203682	0.0394142	0.0491745	0.0280713	0.0160059	0.0132202	0.0154183
BST2	1.12652	1.51227	1.80495	1.98963	1.81074	1.61345	1.06638	0.75812
ABCA7	0.216182	0.219939	0.179758	0.17017	0.223229	0.15106	0.157401	0.175615
ZFP42	0.000857431	0.00141411	0.00130398	0.00162082	0.00190176	0.00211162	0.000807091	0.00119636
FFAR2	0.37353	0.374234	0.29137	0.280812	0.29173	0.379256	0.344748	0.35187
SNRNP27	0.497128	0.490799	0.397826	0.362338	0.689806	0.453179	0.478411	0.422244
TTC31	0.0702364	0.0668714	0.100561	0.118083	0.0531726	0.0797081	0.114673	0.123474
HIP1R	1.05355	0.898776	0.891424	1.09996	0.914951	0.758512	0.774223	0.713336
TIMP3	0.0106723	0.0207056	0.0092826	0.0102231	0.00202152	0.0227554	0.0158862	0.0137229
MUT	0.364864	0.346627	0.291002	0.303458	0.368376	0.304369	0.387112	0.358268
PMS1	0.0761654	0.0736199	0.105718	0.0863789	0.0996387	0.093207	0.0945867	0.0850885
PROC	0.00889357	0.0152148	0.0222119	0.0136847	0.00914951	0.0102528	0.0112847	0.00982037
SOX2	0.000834627	0.00151841	0.00125978	0.00161111	0.00183469	0.00478891	0.00127089	0.00118036
MMP9	9.03039	7.60738	5.08333	3.16723	8.14354	4.17824	6.86575	4.99016
KCTD17	0.0474324	0.107056	0.193019	0.19961	0.0958064	0.096421	0.105177	0.13659
GNRH2	0.319256	0.228835	0.217699	0.232285	0.199756	0.356758	0.485715	0.451033
TOX4	0.839188	0.754603	0.611473	0.59527	0.771242	0.736014	0.814395	0.735728
ADAMTS5	0.0971451	0.0938653	0.0512016	0.0319311	0.059879	0.0536744	0.0821699	0.0598179
CSF1	0.0478884	0.0292025	0.0110507	0.0158847	0.0151374	0.0552814	0.0781527	0.078371
SLC25A36	0.275016	0.2727	0.375724	0.404395	0.28215	0.237517	0.259657	0.267741
SLC25A22	0.277753	0.26043	0.326733	0.349398	0.299874	0.280585	0.273534	0.232234
RAF1	1.26334	1.10123	1.33345	1.15172	1.47063	0.960996	0.996995	0.998031
OAZ1	61.1148	57.6689	38.3091	41.0866	61.3161	59.4596	49.6671	46.7027
RASSF1	1.89273	1.51227	1.95229	2.05756	2.33768	1.52024	1.87347	1.43947
APEH	0.15005	0.165338	0.309788	0.31737	0.183469	0.110241	0.133298	0.141388
ALCAM	0.0316976	0.0407977	0.0629891	0.0482039	0.0454601	0.0395326	0.0351322	0.0301329
SEC22B	0.716046	0.644174	0.401509	0.359103	0.718548	0.629951	0.602579	0.607775
MFSD10	0.151419	0.13773	0.173865	0.188934	0.134129	0.102528	0.149732	0.149705
CTBP1	1.93834	1.78835	1.73865	1.57229	2.05984	1.54595	1.91365	1.72736
TTC17	0.0344341	0.0352762	0.0710929	0.0604976	0.0315203	0.0443537	0.0617187	0.0607775
KLF9	0.820945	0.809818	0.799335	0.747323	1.05387	0.928856	1.02986	0.879675
ZNF212	0.167838	0.157669	0.158025	0.153994	0.146105	0.128561	0.143889	0.142987
GPR137	0.0119949	0.0127914	0.0121558	0.0098349	0.0137961	0.0159738	0.0221311	0.0167618
ALS2CL	0.0317888	0.0284663	0.025785	0.0202198	0.0162871	0.0430681	0.0514931	0.0473425
FAM149A	0.00156436	0.00337424	0.00383091	0.00164346	0.00214127	0.00282192	0.00222407	0.00280216
HOMER1	0.0233969	0.0312884	0.0497282	0.0504686	0.0397597	0.0271586	0.0305307	0.0272219
SREBF2	0.182432	0.143252	0.123031	0.128112	0.0972435	0.130811	0.196112	0.16282
TNFAIP2	12.4966	9.41721	14.0712	11.2584	12.886	8.71003	10.4447	9.34055
CAP2	0.00174679	0.00151534	0.00131872	0.00160464	0.00310892	0.00353544	0.00353513	0.00323081
ME1	0.0397702	0.0490799	0.0611473	0.0517626	0.0397118	0.0639593	0.0748659	0.0534203
IER3	0.524492	0.420247	0.504649	0.391455	0.238079	0.395326	0.562407	0.438238
NSMCE2	0.36076	0.343559	0.306473	0.279842	0.40095	0.356758	0.368852	0.361466
CREB3	0.0615709	0.0696321	0.117138	0.12973	0.0996387	0.0594596	0.0544147	0.0489419
SLC25A16	0.0725168	0.0647241	0.073303	0.068262	0.0857467	0.0629951	0.0752311	0.0694143
RANBP9	0.222567	0.227301	0.186389	0.201551	0.25724	0.235267	0.223502	0.204724
CALD1	0.0232145	0.0328222	0.0386775	0.0627622	0.0312329	0.0337474	0.0250527	0.0231914
SHFM1	3.68513	2.99387	2.79583	2.45225	3.18556	3.59972	4.16327	3.42273
GORASP1	0.0043282	0.00478529	0.0124873	0.0144935	0.00847887	0.00726372	0.00463803	0.00483021
CAMK2B	0.00177871	0.00169939	0.00144764	0.00162729	0.00512564	0.0016488	0.0014608	0.00119956
NCOA2	0.0219831	0.0346627	0.046413	0.0391455	0.0351609	0.0240088	0.0196112	0.0248228
PRX	0.0290067	0.0524541	0.0718296	0.0740852	0.043065	0.0359972	0.0279378	0.0308686
ZNF219	0.323361	0.236504	0.390458	0.414101	0.300353	0.218876	0.245414	0.239591
SULF1	0.00101706	0.00146626	0.0012782	0.00339692	0.00191613	0.0021759	0.000785179	0.00130192
SLC25A37	0.0277753	0.0506136	0.0552536	0.040116	0.0399992	0.0903144	0.0923955	0.143627
HMGXB4	0.138192	0.138037	0.121926	0.140083	0.136045	0.120526	0.153749	0.13563
TAF2	0.239898	0.237424	0.306841	0.265607	0.235205	0.227232	0.268056	0.229995
PPIL2	0.0697803	0.0720861	0.127083	0.133936	0.105866	0.0662091	0.0726747	0.0687746
EXT1	0.0290979	0.0447854	0.0604106	0.0443217	0.0447895	0.0401754	0.0316628	0.0266781
LRRFIP1	0.303293	0.24632	0.184179	0.123907	0.285503	0.219519	0.239206	0.261983
WSB1	2.37162	2.2362	2.07017	1.98639	2.3281	2.24982	2.18389	2.27756
PLLP	0.0130895	0.0215031	0.0332995	0.0281783	0.0146584	0.0226268	0.024797	0.0201525
ACTG1	15.3243	12.1166	13.0767	13.0054	11.401	11.0241	13.2933	11.7397
FASN	0.00615709	0.00996936	0.00589371	0.00763499	0.00584419	0.00674947	0.00613535	0.00550197
DCXR	0.245371	0.243252	0.73303	0.659973	0.244785	0.217912	0.293986	0.279577
FLII	1.10371	0.914113	1.37766	1.33612	1.2359	0.777796	0.854567	0.841289
NT5DC2	0.00994255	0.0154295	0.017497	0.0167258	0.0134129	0.016263	0.00872827	0.0118996
DSC2	0.0264983	0.0213191	0.0372041	0.0305723	0.0289814	0.0242338	0.0203416	0.0295251
TALDO1	10.5811	9.41721	10.8297	9.25257	10.9698	9.60996	9.49519	9.30856
UPF3B	0.0529053	0.0677916	0.0931943	0.0841143	0.110177	0.100278	0.0708487	0.08125
FAM3A	0.0197027	0.0217179	0.0263744	0.0254284	0.0221313	0.026098	0.0236284	0.0267741
SETBP1	0.56554	0.500002	0.427294	0.491745	0.651484	0.456393	0.551451	0.550197
DIO1	0.00861992	0.00858898	0.00795651	0.00153023	0.00184906	0.00957782	0.0197208	0.00914862
TPR	1.44577	1.23007	1.35924	1.13554	1.35087	1.43025	1.4681	1.6346
TFB2M	0.296908	0.268712	0.295791	0.2834	0.308497	0.277371	0.342192	0.29685
FBXO2	0.0734289	0.0711659	0.0972463	0.122289	0.0541306	0.0466035	0.0679271	0.0633366
GPR137B	0.213902	0.170246	0.25564	0.27143	0.218918	0.197985	0.268422	0.194808
MTF2	0.206148	0.19816	0.214752	0.186022	0.22275	0.262587	0.263674	0.258145
BCL3	4.28259	3.37424	3.75724	2.73695	4.23943	3.43902	3.24297	3.23081
MMS19	0.296908	0.315952	0.449396	0.430277	0.401429	0.254873	0.319184	0.339075
RASSF7	0.0210253	0.0279755	0.0334468	0.0355868	0.0297958	0.0161345	0.0194651	0.0175935
NOX4	0.000880235	0.00147546	0.00130767	0.0015917	0.00192571	0.00105099	0.000807091	0.00117077
ST14	0.143209	0.109203	0.151026	0.118731	0.121674	0.114098	0.150827	0.141068
RPS25	50.6249	46.6259	45.6763	49.8215	43.9751	49.4961	47.1107	36.4665
CDK2	0.00394053	0.0103988	0.00744081	0.0068262	0.0102513	0.00800295	0.00544147	0.00617372
FOLH1	0.0138648	0.0141411	0.0102035	0.0131995	0.0110177	0.0173558	0.0206338	0.0170817
ARL6IP4	1.29983	1.13191	2.25435	2.28726	1.48021	0.877431	1.17229	1.01722
IFT81	0.000934965	0.00154295	0.00137029	0.00168229	0.00208379	0.00112491	0.000920303	0.00124754
MCRS1	0.124966	0.125767	0.13666	0.146876	0.117363	0.0896716	0.107369	0.103322
DIO2	0.00825506	0.00877303	0.00175706	0.00299253	0.0037604	0.0119562	0.0106273	0.00924458
MFGE8	0.0106723	0.0205215	0.0198544	0.0242314	0.0175805	0.0188985	0.0154479	0.0171457
SNX1	0.365776	0.322087	0.408876	0.384984	0.40574	0.305976	0.298003	0.261343
SPINT1	0.0165557	0.022178	0.0263744	0.0251696	0.0209816	0.0185128	0.0140237	0.0142347
CDH3	0.0310135	0.0203375	0.0160972	0.0123907	0.00958064	0.0376042	0.0602579	0.0393455
TNFRSF12A	0.0412753	0.0463192	0.0456763	0.0498215	0.0665854	0.0277693	0.0312976	0.0291092
CALM3	0.866553	0.736199	0.593055	0.569389	0.546096	0.633165	0.810743	0.671752
GRN	31.4239	26.3191	29.3212	31.0576	33.4364	17.3879	22.1311	21.4321
RGS13	0.000889357	0.00146626	0.00191177	0.00163699	0.00198319	0.00106706	0.000832655	0.00120915
FMO5	0.0204324	0.0282823	0.0344045	0.0407631	0.0358316	0.0129847	0.015594	0.0116757
MAP3K7	0.270456	0.23405	0.2398	0.218697	0.279276	0.287013	0.32028	0.292372
ADCY6	0.00294172	0.00555216	0.0056727	0.00815261	0.00247181	0.0031144	0.00127089	0.00249508
LIPT1	0.0743411	0.0923316	0.128925	0.108054	0.106824	0.101885	0.0978735	0.104921
DHPS	0.0893918	0.108589	0.167602	0.180846	0.116884	0.0874217	0.0945867	0.0844488
COG8	0.218463	0.20859	0.368357	0.39469	0.256761	0.196056	0.21912	0.195448
POLDIP3	0.898478	0.788346	0.902475	0.847613	0.886209	0.652449	0.781527	0.722933
MAPK11	0.201588	0.243252	0.184915	0.226785	0.19784	0.301798	0.357165	0.367864
CLPTM1	0.0210253	0.0251841	0.022875	0.0262695	0.0281671	0.0173879	0.0216929	0.0225197
NOS2	0.00976012	0.00825156	0.00699878	0.00208668	0.00675435	0.0122776	0.0147175	0.010876
IL6ST	0.0181064	0.0296013	0.0563586	0.0436747	0.0256282	0.033426	0.0240666	0.0257185
LPAR1	0.0073885	0.0173007	0.0181232	0.0191198	0.0152332	0.0104135	0.00902043	0.00572588
KL	0.00424155	0.00223007	0.00445712	0.00208021	0.00429692	0.00298262	0.00376156	0.00364665
ABR	3.9907	3.40492	4.42028	4.33512	4.50769	3.14011	3.68852	3.10285
FAM32A	0.79358	0.797548	0.777233	0.731147	0.843096	0.691017	0.734051	0.671752
FTL	23.4425	24.9694	34.5151	37.8514	34.8735	29.5691	26.0752	27.03
CRTC1	48.3445	56.4419	43.8345	51.1156	59.879	61.7095	67.1967	77.0915
MBD3	0.276385	0.230982	0.500966	0.465864	0.353047	0.219519	0.314437	0.313164
RUNX3	0.948647	0.708591	1.09034	1.21319	0.833516	0.719944	1.1029	0.975639
ISYNA1	0.0497128	0.0475462	0.10756	0.104819	0.0465619	0.0485319	0.0609883	0.0610974
DNAJB4	0.0274104	0.0343559	0.0292107	0.0300547	0.0468493	0.0430681	0.0278282	0.0310605
HSD3B2	0.0199763	0.0182823	0.0162445	0.0158847	0.0119758	0.0234946	0.0344748	0.0332677
PTAFR	2.73648	2.34663	3.86775	3.1834	2.32331	1.99913	2.32267	2.33194
GGPS1	0.524492	0.536811	0.541485	0.49498	0.661064	0.472463	0.507627	0.438238
UNC5B	0.0134088	0.0157362	0.0211437	0.0151406	0.0204547	0.0369614	0.011029	0.0070374
MRPL34	0.747972	0.668714	1.47343	1.34906	0.843096	0.658877	0.887435	0.735728
TRIM38	0.0497128	0.0917181	0.110139	0.115172	0.12886	0.0957782	0.0642751	0.0626968
PPME1	0.0195658	0.0319019	0.0467813	0.0346163	0.0507774	0.0482105	0.030275	0.0422244
RSRC2	1.9201	1.69326	1.45501	1.2326	2.38558	1.52024	1.74565	1.76575
CNPY2	1.98851	1.94479	1.85284	1.85051	2.03589	1.84807	2.04147	1.76895
RND1	0.00209341	0.00361964	0.00128188	0.00191522	0.0019305	0.00255194	0.00204512	0.00261024
CHD4	0.474324	0.380369	0.489915	0.452923	0.406219	0.340688	0.474759	0.444636
LTBR	0.166013	0.165951	0.212542	0.193463	0.254845	0.144953	0.143158	0.159301
CCDC53	0.538175	0.395707	0.574637	0.50145	0.483822	0.469249	0.566059	0.556594
WNT5B	0.00670438	0.0119019	0.0170918	0.0116466	0.0109219	0.00993137	0.00522235	0.00534203
N4BP2L2	4.01807	3.95707	2.79583	2.23873	4.02866	3.53544	4.23631	3.80659
OSGEP	0.20706	0.201841	0.341835	0.287606	0.245743	0.267408	0.263309	0.228715
DAAM1	0.115388	0.111657	0.149921	0.1472	0.110656	0.139168	0.147541	0.117716
DUOX1	0.00210709	0.00401842	0.00987197	0.00750558	0.00241911	0.00285085	0.00333427	0.00112598
ATP6V0D1	3.12415	2.73927	8.2512	7.79674	2.79755	2.06984	2.43588	2.54946
UBN1	1.36368	1.04602	0.674093	0.514391	1.07303	0.970638	1.12116	1.01083
INPP5K	2.27584	2.28835	2.99106	2.81136	3.11371	2.40088	2.32632	2.65182
ITGA3	0.00214358	0.00717794	0.00814069	0.00685855	0.00512564	0.0038247	0.00241032	0.00367864
FLOT2	1.71942	1.26994	2.48273	2.10286	1.64787	1.20848	1.39871	1.67298
ALOX15	0.00830066	0.0167178	0.0127083	0.0336457	0.0112573	0.00723158	0.00774223	0.0170177
ZCCHC2	0.0408648	0.0588959	0.0655676	0.0672914	0.0550887	0.0604238	0.0529539	0.0342273
FCGRT	11.4932	8.95708	15.2131	13.4259	13.1255	7.77796	9.56823	9.43651
NAPA	0.107635	0.144479	0.188967	0.201874	0.182032	0.202806	0.19173	0.250787
DMWD	1.02618	0.861966	2.03701	2.2452	0.656274	1.16669	2.03416	2.19759
UBA52	90.76	104.295	67.7777	67.6149	52.6935	85.1719	52.2235	64.6161
MAN1B1	0.00953208	0.0141105	0.0162445	0.0267548	0.0247181	0.0120526	0.0179313	0.035187
GPSN2	0.647634	0.533744	1.38871	1.44935	0.60358	0.556028	0.927607	1.03002
ZC3H15	1.8152	1.6135	1.64656	1.62082	1.94487	1.62952	1.94286	1.71137
AAMP	0.223479	0.214725	0.249009	0.245225	0.246222	0.16038	0.184061	0.178494
HNMT	0.133632	0.15	0.125978	0.112907	0.165745	0.127597	0.142428	0.101083
ACP1	0.538175	0.705524	0.552536	0.559683	0.60358	1.03492	0.726747	0.854084
DDX18	0.159628	0.192025	0.202596	0.203168	0.202631	0.193163	0.165435	0.171137
SERTAD2	0.0216638	0.0380369	0.0530434	0.0507921	0.0260593	0.0697445	0.0376156	0.0396653
MYH9	0.320168	0.295093	0.220646	0.24749	0.361669	0.200877	0.232632	0.252067
SLC25A17	0.143665	0.180062	0.102772	0.112584	0.160476	0.122133	0.141697	0.10748
NFE2L2	2.06604	1.90185	2.77741	2.26785	2.35205	2.06662	2.14007	2.29355
CMTM6	25.5861	23.1289	12.4136	11.9701	22.3708	23.6553	26.8787	26.4862
ACY1	0.0647634	0.0653376	0.13224	0.131995	0.0708967	0.0527102	0.0745007	0.0633366
ALAS1	0.0199307	0.0259817	0.0293581	0.0275636	0.0279755	0.0179665	0.0134393	0.0141388
MCCC1	0.711485	0.680984	0.430978	0.452923	0.823935	0.604238	0.631795	0.598179
HPCAL1	0.286418	0.291105	0.322312	0.368809	0.325263	0.264836	0.288873	0.259424
MGAT1	2.44003	2.46627	4.53079	4.69099	3.0706	2.29161	3.10054	3.83858
TRIM52	0.252669	0.230676	0.320102	0.307988	0.231372	0.245231	0.255274	0.301968
PITX1	0.00620269	0.00711659	0.00131872	0.00166934	0.002079	0.0106385	0.00938563	0.00700541
CTNNA1	0.615709	0.592026	0.843538	0.821732	0.761661	0.56567	0.507627	0.553395
TAP1	9.57769	10.1841	13.1503	13.2318	12.0716	9.54568	8.87435	6.90945
POU5F1	0.0412297	0.0496934	0.0512016	0.0326752	0.0338676	0.0456393	0.0350957	0.0281176
CDKN1A	0.538175	0.509204	0.692511	0.669679	0.402387	0.710302	0.821699	0.857283
NRF1	0.017103	0.0217485	0.0342572	0.0279518	0.0225145	0.0156202	0.0172739	0.0128273
TARP	0.421874	0.340492	0.740398	0.773204	0.517355	0.440323	0.566059	0.329478
LUC7L2	0.171942	0.151227	0.326364	0.298929	0.221792	0.186093	0.217294	0.202805
EDF1	2.40354	2.13191	3.36678	3.04429	2.18439	2.17269	2.54544	2.14001
PPP2R4	0.112196	0.0957058	0.146238	0.157876	0.0867048	0.0993137	0.185887	0.191289
UBAP2	0.120861	0.146626	0.344045	0.349398	0.186822	0.12374	0.130011	0.146826
DNAJC7	0.26179	0.261044	0.312735	0.298282	0.218918	0.305012	0.313341	0.286614
RPRD2	0.501688	0.374234	0.423611	0.433512	0.434003	0.392112	0.419979	0.441437
SEC23B	0.212533	0.216872	0.272216	0.285665	0.245743	0.179665	0.173835	0.180093
HGS	0.474324	0.426382	0.626207	0.637327	0.454122	0.309833	0.434587	0.447834
CD2BP2	0.0547296	0.0576689	0.0600422	0.0559683	0.0637113	0.0376042	0.0427283	0.0415846
COL4A3BP	0.916722	0.745401	0.791968	0.637327	0.59879	0.954568	0.887435	0.911663
TTC37	0.427803	0.411044	0.478864	0.410866	0.397597	0.379256	0.427283	0.403051
TIMP1	0.519932	0.411044	1.13086	1.01261	0.438793	0.417824	0.573363	0.543799
FAM127B	7.16046	8.03683	8.43538	9.64079	8.09564	8.32435	11.7959	14.0108
VEGFA	0.00994255	0.0143252	0.0197071	0.0192816	0.0255803	0.0135311	0.0108464	0.010812
U2AF1	11.6301	10.0921	8.73006	7.57028	10.9219	10.0599	12.4898	10.6521
CLDN5	0.743411	0.616566	0.637258	0.805556	0.627532	0.575312	0.423631	0.323081
ZWINT	0.067956	0.0984666	0.077355	0.089614	0.0876629	0.0674947	0.0642751	0.0591781
KLF6	8.16384	7.39266	10.5718	9.57608	8.19145	7.07088	7.66919	7.10137
FAS	1.40929	1.38651	1.2782	1.11613	2.15564	1.36596	1.50462	1.10359
CTBP2	4.30084	3.65032	3.75724	3.75279	4.34961	3.3426	3.72504	3.96653
AP1B1	0.0237618	0.0214418	0.0315682	0.0352633	0.0295084	0.0245231	0.0290334	0.0250467
MTCH2	0.720607	0.426382	0.534118	0.543508	0.670645	0.51746	0.529539	0.473425
ALG9	0.0560979	0.0527609	0.0987197	0.098996	0.0680225	0.0437109	0.0628143	0.0559793
FADS3	0.0155523	0.0225461	0.0195598	0.0215462	0.0152332	0.0141096	0.0168722	0.0132751
ZCCHC8	0.542736	0.506136	0.61884	0.611446	0.594	0.446751	0.511279	0.46063
STK38L	0.404087	0.398774	0.366515	0.286959	0.526935	0.401754	0.438239	0.390256
ACADS	0.0108091	0.0138037	0.0214015	0.0257196	0.0206463	0.00977066	0.00690227	0.0122835
TEP1	0.729729	0.699389	0.534118	0.530567	0.982016	0.610667	0.682923	0.59498
DACT1	0.0202044	0.0250001	0.0337415	0.0319311	0.0304185	0.0314654	0.0262213	0.0313804
TSC2	0.0802701	0.1	0.152131	0.142347	0.115447	0.0938498	0.107003	0.115797
PDPK1	0.820945	0.828223	1.26346	1.0676	0.972435	0.742442	0.832655	0.735728
SMARCD2	0.276841	0.227301	0.172023	0.148494	0.223708	0.196056	0.262213	0.234473
HS3ST3A1	0.000889357	0.00145399	0.00132609	0.00161111	0.00197361	0.0010542	0.000818047	0.00119636
GFAP	0.00085287	0.00139878	0.00128188	0.00155611	0.0018826	0.00100921	0.000792483	0.00115157
KRT19	0.0202044	0.0286197	0.0215489	0.0207374	0.0171972	0.028637	0.0249431	0.0224877
CDC42EP4	0.0166925	0.0280676	0.0274794	0.0250078	0.0204547	0.02703	0.0260022	0.0259424
CALR	1.31807	1.27914	2.27276	2.3649	1.42752	1.2599	1.54114	1.30832
PSMD8	1.07635	0.969328	1.88599	1.92492	1.32692	0.903144	0.964127	0.857283
CAPNS1	0.893918	0.911046	2.35012	2.55254	0.934112	0.626737	0.803439	0.796506
ZNF85	0.126334	0.182209	0.333363	0.323193	0.195445	0.29762	0.280838	0.261983
RAB11B	0.0288699	0.0401842	0.0482548	0.0439982	0.0536516	0.0475677	0.0427283	0.0495817
BARD1	0.108091	0.111657	0.103508	0.114525	0.116405	0.110241	0.120151	0.0719734
GMPPA	0.00930404	0.0115338	0.0379408	0.0397925	0.0149937	0.00636379	0.00839959	0.0105561
PCBP1	24.8108	22.8835	27.9951	28.4694	25.0534	27.93	26.4404	23.3834
CTNNBL1	0.096689	0.0963193	0.162814	0.181493	0.112573	0.105099	0.0934911	0.0937254
ADRM1	0.273648	0.230676	0.3341	0.339692	0.2079	0.218876	0.318454	0.29621
TUG1	2.4081	1.8589	2.47904	2.3649	1.88739	2.07305	2.1912	2.21678
ST13	2.50388	2.98774	2.68901	2.92782	3.40592	3.76042	3.72504	3.87057
CLEC3B	0.20478	0.216565	0.264112	0.346163	0.223708	0.16488	0.20999	0.170497
TMC5	0.0766215	0.14908	0.108297	0.119378	0.195445	0.262908	0.204147	0.211762
SEC24B	0.165101	0.128835	0.19965	0.172111	0.171493	0.148167	0.18333	0.198647
GLRX	8.71114	9.47856	7.88284	7.14971	13.0297	12.3419	9.20303	7.5812
ALG3	0.156436	0.176074	0.394142	0.397925	0.205505	0.162309	0.22898	0.246309
CD74	0.67956	0.858898	1.03877	1.13231	0.804774	0.601024	0.635447	0.607775
CHD1	0.43282	0.411044	0.578321	0.504686	0.560467	0.433895	0.485715	0.505413
APC	0.0177415	0.0186504	0.0209964	0.0186022	0.0229456	0.0171629	0.0171644	0.0156422
PHF3	1.67838	1.53375	1.60972	1.46876	1.75805	1.63594	1.81504	1.6218
HLA-C	10.8091	10.8896	11.0507	11.8407	12.7902	8.13151	7.92483	9.85236
SLC39A7	0.045608	0.0395707	0.0390458	0.0352633	0.0302748	0.0437109	0.033781	0.0361466
ZCWPW1	0.232601	0.239265	0.205543	0.234549	0.218918	0.188342	0.20999	0.202165
IL6	0.0185625	0.0195399	0.0278846	0.0307017	0.016814	0.0263872	0.0299829	0.0277018
RBPMS	0.0010353	0.00231596	0.00138871	0.005888	0.00215564	0.00449965	0.000869175	0.00224557
FDFT1	0.948647	0.941721	1.06455	1.23907	1.14489	1.07992	1.17959	0.882874
MTMR9	0.104898	0.102148	0.118979	0.123907	0.141793	0.0983495	0.0982387	0.104601
CXCL1	1.33175	1.16872	0.68146	0.511156	1.35566	1.0542	0.953171	0.991633
NOL8	0.656756	0.595094	0.692511	0.59527	0.708967	0.71673	0.741355	0.710137
CKS2	0.409104	0.429449	0.500966	0.446453	0.466577	0.482105	0.540495	0.451033
HBA2	180.152	223.007	135.555	142.671	93.4112	73.6014	16.7261	23.6073
YWHAE	0.294628	0.306136	0.467813	0.407631	0.267779	0.275764	0.290334	0.268061
C1QB	0.0224392	0.0444787	0.0725663	0.099643	0.0570048	0.031594	0.0251622	0.0222958
CDS1	0.000912161	0.00157669	0.00134819	0.00161111	0.00205984	0.00115384	0.000850915	0.00119636
IFITM1	34.8445	38.0369	45.6763	43.0277	46.0829	56.8884	30.129	22.6476
SPP1	0.154611	0.0822088	0.0438345	0.0326752	0.0718548	0.0268693	0.0898391	0.0268381
EDNRA	0.000871114	0.00343559	0.00168708	0.00163699	0.00193529	0.00331046	0.00215833	0.00120276
ARAF	0.0875674	0.0953991	0.139976	0.142671	0.109698	0.0787438	0.0934911	0.0950049
MSN	6.61317	4.63192	4.16243	3.59103	4.72805	5.04603	6.46403	5.37401
MMP23B	0.0592905	0.0634971	0.215489	0.210609	0.0967645	0.051746	0.0675619	0.0745324
TCEB3	0.0825506	0.0911046	0.107192	0.0993195	0.104908	0.0941712	0.0920303	0.0822096
TAGLN2	14.9594	8.74236	6.11473	6.0174	7.32919	8.67789	17.1644	15.8022
MTF1	4.39205	3.95707	2.5785	2.41667	5.12564	3.76042	3.568	3.29478
C1orf50	0.338412	0.365032	0.570953	0.543508	0.517355	0.35033	0.405371	0.374262
G0S2	0.370793	0.331289	0.401509	0.349398	0.424901	0.331046	0.361548	0.409449
RPS27	59.2905	53.9879	45.3079	42.7042	51.7355	52.3888	54.4147	38.7057
NUDC	0.302837	0.295093	0.341835	0.336457	0.350172	0.20602	0.188808	0.179134
DEDD	0.269544	0.253375	0.275531	0.239402	0.283587	0.282835	0.266596	0.260384
EYA3	0.00474324	0.00567486	0.00449396	0.00462628	0.00455559	0.00665305	0.00511279	0.00483021
C1orf54	0.21527	0.215952	0.15029	0.17664	0.235205	0.248766	0.214372	0.187451
SDC3	0.00871114	0.0128528	0.00725663	0.00472334	0.00943693	0.0128883	0.00996995	0.00706939
AIP	1.23598	1.16565	1.78653	1.75346	1.25506	0.89993	1.13942	0.918061
NDUFS3	0.779897	0.730064	0.651992	0.68909	0.785612	0.601024	0.693879	0.582185
BRMS1	0.406368	0.386504	0.629891	0.624387	0.471367	0.251016	0.3652	0.319882
SLC3A2	0.0925843	0.0990801	0.362463	0.365573	0.121195	0.093207	0.120516	0.0908464
PSMB4	9.89694	9.41721	6.04106	5.24097	11.2573	7.77796	10.2986	7.96506
TCTN1	0.117213	0.0914113	0.135924	0.110643	0.122632	0.0887073	0.111386	0.0962844
PRMT5	0.20706	0.20859	0.272584	0.251696	0.243348	0.175486	0.167261	0.175295
TIMM9	0.770776	0.573621	0.570953	0.433512	0.541306	0.723158	0.814395	0.665354
RPS29	36.0304	27.6381	21.7331	19.3786	24.4785	33.7474	45.2847	36.7864
SORD	0.138192	0.220246	0.237222	0.315105	0.268258	0.137882	0.0920303	0.0770915
RNF111	0.784458	0.631904	0.77355	0.692325	0.814354	0.668519	0.792483	0.777313
TUBB3	0.00830066	0.0104908	0.017718	0.0142024	0.00632322	0.00562456	0.0112116	0.00133071
PKD1	0.056554	0.0622701	0.0707245	0.0647033	0.0483822	0.0491747	0.0598927	0.0588582
EIF3C	17.7415	17.8528	13.2609	12.9083	23.1851	18.095	15.5575	18.5531
ATP5H	5.83783	5.30676	4.30978	3.75279	7.04177	5.72098	6.61011	5.56594
PITPNA	0.306942	0.306749	0.416243	0.420571	0.464661	0.254873	0.278282	0.284695
MIS12	0.232601	0.200001	0.244957	0.185698	0.152811	0.219519	0.306037	0.220399
AP1M2	0.0233513	0.0253068	0.0460446	0.0420571	0.0298916	0.0260015	0.0387112	0.040625
FARSA	0.100794	0.107669	0.157288	0.161111	0.117842	0.0768154	0.0865523	0.0873277
NUCB1	0.032701	0.0417179	0.0534118	0.0504686	0.0531726	0.0501389	0.034767	0.0361466
PRKD2	0.843749	0.785278	0.942994	0.799085	0.867048	0.777796	0.818047	0.806102
USE1	0.199763	0.196626	0.33189	0.326752	0.182032	0.167773	0.190269	0.16154
CREB1	0.313783	0.247854	0.386775	0.28793	0.242869	0.376042	0.394416	0.364665
PGAP1	0.000843749	0.00140491	0.00219541	0.001527	0.00187302	0.00102528	0.00134028	0.00294291
IL1R2	5.29053	4.01842	3.46256	2.28403	5.89209	3.95326	4.23631	2.92372
MRPL2	0.0697803	0.0684051	0.143659	0.149465	0.0656274	0.0813151	0.0949519	0.0991633
C2orf42	0.135912	0.173313	0.223593	0.224844	0.185385	0.169701	0.143889	0.139149
IL1B	3.13327	2.52761	3.72041	2.78548	3.22868	4.17824	3.26854	3.12844
GNMT	0.0180608	0.0188037	0.0274794	0.0221932	0.0206942	0.0227875	0.020999	0.0153863
APOB	0.000971451	0.00157362	0.00243116	0.00164993	0.00211253	0.00114098	0.000869175	0.00123474
NOP56	0.44103	0.478529	0.736714	0.769969	0.584419	0.417824	0.423631	0.393455
E2F1	0.020478	0.0328222	0.0241274	0.0272401	0.0317598	0.0260337	0.0202321	0.0214001
RRP1	0.236706	0.19908	0.347361	0.329987	0.250055	0.171629	0.204512	0.184892
NHP2L1	0.939526	0.880371	1.39239	1.38789	0.814354	0.819579	0.993343	0.850885
THRB	0.0116301	0.0132516	0.0244589	0.0280489	0.0128381	0.0257444	0.0112481	0.00652559
IRAK2	0.0317432	0.0334357	0.0303895	0.0282753	0.0440709	0.0388898	0.0441891	0.0412647
SETMAR	0.0633952	0.0622701	0.0972463	0.0964079	0.0694596	0.0620309	0.0810743	0.0642962
USP4	0.311047	0.282516	0.5157	0.423806	0.31185	0.331046	0.302385	0.374262
PPAT	0.0317888	0.0453989	0.0552536	0.0537037	0.0426818	0.0469249	0.0347305	0.040625
COX7A2	5.6554	4.78529	5.157	4.52923	5.60467	5.78526	6.79271	6.14173
HSD17B8	0.131807	0.0889573	0.114927	0.116466	0.0862258	0.114098	0.186252	0.173056
TEAD3	0.0971451	0.0806751	0.0803018	0.0753793	0.0536516	0.120526	0.149732	0.138829
SOX4	0.120861	0.127301	0.146606	0.140406	0.110656	0.109599	0.107003	0.0847687
GNB2	0.43282	0.389572	0.390458	0.329987	0.507774	0.274157	0.31115	0.358268
DFNA5	0.00693242	0.00938653	0.0121558	0.01362	0.00685016	0.00761726	0.00241032	0.00122195
PCM1	0.606587	0.625769	0.659359	0.634092	0.570048	0.755298	0.715791	0.604576
RECK	0.280033	0.285277	0.200755	0.188287	0.314245	0.21309	0.250527	0.221038
KLHL9	0.766215	0.659511	0.453079	0.50145	0.704177	0.494961	0.657359	0.572588
ENDOG	0.223479	0.194786	0.272584	0.263019	0.249576	0.219197	0.297272	0.273179
ENG	0.051081	0.0383437	0.0405193	0.039469	0.031664	0.0523888	0.0712139	0.0582185
LIMCH1	0.00137736	0.00148773	0.00131135	0.00161758	0.00202631	0.0013981	0.00199764	0.00206963
UBE2Z	1.06723	0.929451	1.18243	1.11937	1.02513	1.04778	1.16499	0.911663
SMARCC1	0.389949	0.349694	0.271847	0.252019	0.345382	0.281228	0.341096	0.323081
IQCB1	0.237162	0.237424	0.147711	0.137494	0.250055	0.187057	0.193556	0.200246
HMX1	0.0188361	0.0179142	0.0198176	0.0181493	0.0152332	0.0227554	0.0372504	0.0295891
SIGIRR	1.56892	1.27608	2.73689	2.53313	1.62871	1.16669	1.5594	1.48425
FAM107A	0.00443766	0.00309817	0.00486231	0.00375279	0.00186343	0.00424253	0.00485715	0.00467027
TMEM53	0.0506249	0.0518406	0.0663043	0.0724677	0.0427776	0.0482105	0.0653707	0.0626968
LAMB3	0.0519932	0.0515339	0.0434661	0.0511156	0.0938903	0.0523888	0.0566059	0.048622
EIF3A	9.12161	9.26383	6.96195	7.27912	13.5087	8.48505	8.69175	8.60482
DMTF1	0.311503	0.256749	0.497282	0.420571	0.268737	0.319796	0.394416	0.383858
CEP57	0.334763	0.282823	0.309788	0.289547	0.289335	0.324617	0.363374	0.326279
SART1	0.376266	0.386504	0.600422	0.553213	0.60358	0.369614	0.316263	0.302928
FADD	2.58142	2.17485	1.97071	1.84728	1.45626	2.11483	2.52718	2.79257
AASS	0.00176047	0.00478529	0.00438345	0.00634092	0.00202152	0.00453179	0.00347305	0.005406
IFITM3	19.2466	23.405	34.8834	31.9311	22.7061	30.3083	16.3975	14.9385
TARBP2	0.0633952	0.0610431	0.133345	0.125848	0.0766451	0.0485319	0.0701183	0.0620571
SART3	0.10125	0.0953991	0.126715	0.125848	0.116405	0.0826007	0.100065	0.0918061
CYP3A5	0.000834627	0.00138957	0.0016134	0.00161435	0.00184427	0.0014431	0.000829003	0.00118676
CDC16	0.275473	0.306749	0.430978	0.443217	0.38083	0.363186	0.300559	0.326279
MCF2L	0.200675	0.156135	0.12561	0.126171	0.0938903	0.221447	0.315532	0.278937
EPHX2	0.213902	0.178528	0.330416	0.221609	0.216522	0.215662	0.1826	0.286614
NEDD8	9.39526	7.05524	9.2826	9.05846	8.67048	7.29586	7.92483	7.13336
ANPEP	0.597465	0.444787	0.563586	0.459393	0.646693	0.392112	0.409023	0.476624
MVP	6.70438	7.39266	18.381	20.0904	9.38903	7.19944	11.5768	15.1304
ALDOA	3.95422	3.43559	7.7355	7.18206	4.50769	2.78014	3.90764	3.7746
CLN3	0.377635	0.312884	0.489915	0.517626	0.387058	0.252945	0.3484	0.361466
NUP93	0.1838	0.218712	0.202965	0.244902	0.265863	0.14656	0.154845	0.133391
MX1	6.15709	12.178	8.69323	12.6818	15.5206	23.0125	8.36307	5.50197
ERBB2	0.122686	0.144172	0.115664	0.164023	0.117363	0.0787438	0.106273	0.130512
EPN2	0.239442	0.292639	0.214752	0.297312	0.209337	0.156523	0.193921	0.19001
CCL2	0.0311047	0.0585891	0.0416243	0.0459393	0.0399034	0.101242	0.0514931	0.0415846
AATF	0.665877	0.573621	1.17874	1.07407	0.737709	0.56567	0.661011	0.601378
ACAA2	0.371706	0.358897	0.401509	0.39469	0.475679	0.421039	0.405371	0.422244
TRIM28	0.226672	0.223314	0.519383	0.459393	0.240953	0.185128	0.216563	0.220079
ZNF180	0.0976012	0.0861966	0.10756	0.106437	0.105387	0.0729586	0.0792483	0.0831693
PIH1D1	0.174223	0.169632	0.267427	0.329987	0.196882	0.162952	0.162879	0.153863
PIAS4	0.103074	0.0760738	0.0570953	0.0627622	0.0488613	0.111527	0.159227	0.151944
SF3A2	7.06925	8.34358	16.3551	20.2198	7.56871	9.22428	16.1783	22.1358
RBM42	0.547296	0.530676	1.04982	1.17113	0.617951	0.456393	0.518583	0.495817
MRPL44	0.289155	0.334357	0.430978	0.404395	0.550887	0.385684	0.358991	0.275418
TRIB2	0.2025	0.184356	0.189704	0.170493	0.226582	0.19477	0.202321	0.178814
DES	0.00643073	0.0101227	0.00965095	0.00598505	0.00771242	0.00928856	0.00829003	0.0078371
TIA1	0.130895	0.175154	0.187862	0.171787	0.203589	0.191878	0.136585	0.148105
CNTNAP3	0.0912161	0.0846628	0.183442	0.121319	0.0934112	0.0954568	0.165435	0.169537
THBD	1.13108	0.960126	1.17506	1.0029	1.40835	1.00599	1.21977	1.05241
EWSR1	0.27	0.259203	0.204807	0.204462	0.274006	0.208269	0.198303	0.236712
TLN1	0.0875674	0.0947856	0.0839854	0.0918786	0.116884	0.0912786	0.0923955	0.0953248
TYMP	2.513	2.47854	4.42028	3.72044	3.77477	1.75165	1.95382	1.55782
TKT	9.16722	7.60738	8.69323	7.21442	8.57467	6.23523	7.81527	6.30167
IFRD2	0.304662	0.346627	0.438345	0.452923	0.517355	0.504603	0.430935	0.473425
MBD4	0.342516	0.269939	0.383091	0.310252	0.335801	0.318511	0.33014	0.332677
WDR5B	0.0177871	0.0217179	0.0316787	0.0384984	0.0239516	0.0200877	0.0207433	0.0165699
GTPBP8	0.839188	0.760738	0.512016	0.559683	0.699387	0.626737	0.697531	0.665354
CASP3	1.62365	1.54602	1.34819	1.33612	1.45147	1.45917	1.7347	1.3563
BDH2	0.26179	0.193252	0.226908	0.202198	0.264905	0.208269	0.286316	0.199606
OCLN	0.00556418	0.00337424	0.0120821	0.00507921	0.0106824	0.00102528	0.00295812	0.00738927
SAR1B	0.524492	0.453989	0.379408	0.322869	0.550887	0.520674	0.584319	0.46063
SLC44A4	0.00384476	0.00478529	0.00142554	0.00172758	0.00224187	0.00421039	0.00379808	0.00345472
PEX7	0.112196	0.113191	0.111612	0.121966	0.142273	0.0996351	0.112116	0.0991633
TRIM24	0.379459	0.325154	0.243484	0.240373	0.409093	0.327832	0.329045	0.329478
MCM7	1.18581	1.21473	2.30223	2.20638	1.41314	0.935284	1.15403	1.16117
SDK1	0.00811823	0.00693254	0.00574637	0.00559683	0.00380351	0.00893502	0.00748659	0.00578986
TOMM7	12.7246	9.57058	10.1667	9.80255	14.4189	10.1885	12.6724	10.812
TRRAP	0.197483	0.185277	0.232802	0.218697	0.228977	0.166487	0.205973	0.179134
TSTA3	0.233969	0.290185	0.541485	0.404395	0.285024	0.909572	0.288142	0.355069
WDR6	1.3728	1.2362	2.75899	2.61401	1.29818	1.01242	1.38411	1.38189
RPL38	50.1688	43.8652	29.7632	30.2811	40.1908	45.6393	64.2751	53.4203
LMAN2	1.46402	1.2178	1.23031	1.15172	1.50895	0.935284	1.24898	1.15157
MALT1	0.170574	0.198774	0.231697	0.229697	0.215564	0.179986	0.184426	0.170817
KRT17	0.00633952	0.00671781	0.00478864	0.00381749	0.00401908	0.00874217	0.00865523	0.00793307
PRAF2	0.436925	0.398774	0.548852	0.592035	0.322389	0.491747	0.679271	0.75812
FLNA	0.338868	0.355829	0.359885	0.459393	0.354484	0.302762	0.308228	0.355069
TMSB15B	0.0301469	0.0309817	0.0419927	0.0446453	0.0335801	0.0248123	0.024724	0.0231594
PGLYRP3	0.00807262	0.00530676	0.00386775	0.00417336	0.00400471	0.00890288	0.0108829	0.00774114
MBP	0.00399526	0.00625769	0.00438345	0.00650268	0.00996387	0.0094814	0.0031042	0.00537401
SCAMP3	0.0839188	0.0984666	0.139239	0.133612	0.0943693	0.0723158	0.0931259	0.0873277
CASP9	0.362584	0.328222	0.445712	0.40116	0.422985	0.331046	0.35607	0.329478
TMEM222	0.119037	0.119019	0.221751	0.216109	0.135087	0.0890288	0.107003	0.10812
NCDN	0.0106267	0.0165951	0.0214384	0.0181493	0.0117363	0.00928856	0.0104447	0.0120276
RNPEP	0.143665	0.129448	0.201491	0.147847	0.171493	0.126633	0.113577	0.0921259
POLL	0.19201	0.144479	0.127452	0.127142	0.15856	0.183521	0.264039	0.248548
CYP2E1	0.0113564	0.0103068	0.0126715	0.011226	0.00661064	0.00826007	0.010956	0.00921259
CUTC	0.317432	0.309817	0.239064	0.254931	0.370292	0.210841	0.222772	0.203445
SIRT1	0.442398	0.512271	0.46413	0.433512	0.661064	0.411396	0.522235	0.454232
HRAS	0.0372162	0.0450922	0.0769866	0.0837907	0.0622742	0.0340688	0.0294716	0.0308686
TIMM8B	2.00219	1.51227	1.6134	1.56905	1.68619	1.92521	1.90634	1.67618
HMBS	2.32601	2.56749	2.43116	2.8243	3.82747	3.69614	4.27283	4.3184
UBXN1	6.43073	5.70554	10.2035	10.4172	7.04177	4.33895	5.62407	5.37401
NLRP3	1.69662	1.90798	1.13454	1.15819	2.70653	1.787	1.24898	0.870078
PRMT3	0.0270912	0.0361964	0.0261165	0.0286636	0.0391369	0.0324617	0.0298003	0.0238632
CALCOCO1	0.146858	0.147853	0.252325	0.239726	0.127902	0.116991	0.150097	0.146826
METAP2	3.66233	3.34357	1.95966	1.86669	3.55921	2.75121	3.33427	3.10605
KRT18	0.0325641	0.0441719	0.0408876	0.0352633	0.0388016	0.0446751	0.025564	0.0260064
ZMYM2	0.201131	0.160737	0.241274	0.198639	0.230414	0.160059	0.202686	0.18841
UPF3A	0.743411	0.757671	0.861955	0.821732	0.886209	0.774582	0.759615	0.742126
RBM25	0.583783	0.542946	0.523067	0.420571	0.617951	0.462821	0.474759	0.451033
HMGB1	5.701	4.72394	3.00211	2.74989	4.76637	4.56393	5.07627	4.83021
CABIN1	0.0674999	0.0677916	0.10314	0.08832	0.0565258	0.0691017	0.0934911	0.0844488
UQCRH	5.92905	4.96934	4.97282	4.78804	5.65258	5.88168	6.06231	5.37401
RPL31	0.220287	0.177915	0.313472	0.286636	0.184906	0.268693	0.310054	0.345472
VIPR1	0.0239898	0.0374234	0.126715	0.078938	0.0324784	0.0282835	0.0354609	0.0323081
GPI	4.92567	4.44787	5.82004	6.63209	5.22145	3.9854	4.67455	3.87057
SCML1	0.0278209	0.0328222	0.0280688	0.0161111	0.045029	0.0356758	0.0212911	0.0283095
KIAA0040	0.056554	0.0555216	0.101667	0.0873494	0.114968	0.0723158	0.0540495	0.0617372
AK1	0.574661	0.782211	1.0756	0.905846	1.41793	0.970638	0.792483	1.01403
AP2S1	0.542736	0.592026	1.3666	1.31995	0.7425	0.777796	0.734051	0.89247
CLDN4	0.00620269	0.00625769	0.0092826	0.0102231	0.00785612	0.00829221	0.0144619	0.0122835
BIRC2	0.592905	0.723929	0.68146	0.663209	0.799983	1.11848	0.752311	0.809301
ZNF500	0.111284	0.0963193	0.159499	0.149788	0.0886209	0.0922428	0.10043	0.0908464
KPNA6	0.212077	0.217179	0.221751	0.290841	0.270174	0.241374	0.24724	0.282775
VGF	0.0893918	0.0711659	0.103877	0.105143	0.0579629	0.115062	0.180043	0.177214
HIRIP3	0.0130895	0.0204909	0.0270742	0.0302811	0.02376	0.0125026	0.0100795	0.0144267
SCML2	0.00100338	0.00171473	0.00144764	0.00166611	0.00218439	0.00123098	0.000883783	0.00122835
RUVBL1	0.0133632	0.0229755	0.030721	0.0372044	0.0252929	0.0158773	0.0181869	0.0126673
PRSS8	0.0944086	0.0644174	0.0234275	0.0246519	0.019784	0.116348	0.169087	0.164419
PRICKLE2	0.000893918	0.00146013	0.00131503	0.00159817	0.00197361	0.00107349	0.000818047	0.00117397
RHOBTB1	0.079358	0.0963193	0.118611	0.126818	0.0728129	0.177093	0.0821699	0.0882874
ARFRP1	0.042233	0.0420247	0.0637258	0.0663209	0.0536516	0.0363186	0.0379808	0.0412647
TRIM27	0.280946	0.221166	0.259692	0.237137	0.216043	0.225304	0.360817	0.367864
GNAS	0.00151419	0.00231596	0.00235012	0.00225814	0.0021796	0.00303405	0.00263309	0.00209842
GOSR1	0.27456	0.217485	0.165024	0.139759	0.178679	0.260337	0.278282	0.288853
HAGH	4.25067	4.17179	4.01509	3.52633	5.84419	6.62091	5.14931	6.65354
ZNF264	0.465202	0.432517	0.300948	0.257519	0.336759	0.343902	0.452847	0.435039
GSK3A	4.36469	3.86504	5.12016	4.91745	4.98193	4.66035	4.27283	3.90256
ZNF358	0.0155523	0.013497	0.0116401	0.0192816	0.0135566	0.0170665	0.0218389	0.0202485
ASXL1	0.0807262	0.0773008	0.106455	0.100937	0.0766451	0.0691017	0.0996995	0.0914862
GCAT	0.00688681	0.00677916	0.0122663	0.00941433	0.0167182	0.0136275	0.0105543	0.00793307
RING1	0.229865	0.217179	0.322681	0.362338	0.180116	0.184486	0.268422	0.249508
SIPA1L3	0.120861	0.0996936	0.0736714	0.0824967	0.145626	0.0970638	0.110655	0.0982037
DGCR6	0.0843749	0.102148	0.172391	0.186992	0.105866	0.0723158	0.0737703	0.0687746
MED15	0.167382	0.158589	0.30942	0.291488	0.224666	0.186735	0.211816	0.206004
CYP8B1	0.00556418	0.00552149	0.0180127	0.00643798	0.00723338	0.00938498	0.00847263	0.00834891
MUC4	0.00176503	0.00155522	0.00563586	0.00230991	0.00217001	0.00279942	0.00419979	0.00187131
YWHAZ	3.51182	3.22087	3.45519	3.36457	3.2191	2.69979	3.06037	2.79257
CST3	0.706925	0.855831	2.2654	2.0608	1.11614	0.594596	0.631795	0.630167
ERGIC3	0.51081	0.469327	0.895108	0.821732	0.560467	0.411396	0.449195	0.438238
IL1RL2	0.0492567	0.0267179	0.0087669	0.00634092	0.00876629	0.0575312	0.0894739	0.0751722
RAD23A	0.32701	0.496934	0.401509	0.472334	0.646693	0.636379	0.511279	0.556594
SF1	0.154611	0.168405	0.331153	0.222579	0.150416	0.157166	0.166166	0.234793
ENO2	0.0884796	0.0861966	0.10535	0.0792615	0.0560467	0.0809937	0.0854567	0.0742126
ABCA9	0.000875674	0.00145399	0.00131872	0.00164346	0.00194487	0.00138846	0.000818047	0.00120595
HADHA	0.174223	0.153681	0.263007	0.246519	0.184427	0.144632	0.154479	0.170817
BSCL2	0.0488006	0.0601229	0.0858272	0.0928492	0.0498193	0.0498175	0.0518583	0.0527805
LEP	0.0391317	0.0634971	0.0328574	0.040116	0.0174368	0.0147203	0.00460151	0.0064936
PLVAP	0.00930404	0.0115951	0.00902475	0.00954373	0.0100597	0.00925642	0.00759615	0.00930856
AK3	0.0299189	0.0315952	0.0898791	0.104496	0.0374603	0.0327832	0.0319915	0.0335876
CDKN1C	1.73311	3.55829	4.49396	4.17336	4.14363	2.97298	3.03846	4.15846
PTGS2	0.285506	0.254909	0.172759	0.137171	0.293168	0.209555	0.23811	0.207603
PEA15	1.11284	1.07669	1.49185	1.74052	1.47063	1.00278	1.19055	0.918061
ABCF3	0.241723	0.241719	0.534118	0.498215	0.232331	0.195735	0.253083	0.252387
PAGE4	0.000861992	0.00241105	0.00121189	0.00144612	0.00191613	0.00337474	0.0019246	0.00133391
ACTR1A	1.60084	1.47546	1.24505	1.2973	2.29456	1.88021	1.60323	1.58981
LTBP3	0.107635	0.0880371	0.0526751	0.0517626	0.0349693	0.159095	0.186617	0.184252
TOR1A	0.157348	0.212577	0.255271	0.25849	0.291251	0.29312	0.197208	0.172096
CHST3	0.00229865	0.0023313	0.00135555	0.00163699	0.00220834	0.0019927	0.00327949	0.00476624
TBXAS1	0.706925	0.496934	0.552536	0.511156	0.584419	0.417824	0.493019	0.441437
LYPLA2	0.0136368	0.0145399	0.0195598	0.0179228	0.0195924	0.0146239	0.0134759	0.0127953
CHN2	0.00127703	0.00374234	0.00758815	0.00951138	0.00526935	0.00161345	0.000898391	0.00127313
GAS8	0.000834627	0.00140798	0.00123768	0.00154317	0.00185864	0.00102528	0.000774223	0.00112278
CD14	2.33513	1.8405	2.96896	3.14134	2.31372	1.27597	1.39506	1.55463
IFITM2	25.13	23.7424	41.6243	39.469	24.239	26.5158	18.5156	23.5113
ATXN1	0.15826	0.149694	0.165024	0.145906	0.167182	0.132097	0.142063	0.137229
PPP2R5D	0.153243	0.139264	0.162077	0.160788	0.142752	0.123098	0.177122	0.144906
POR	0.284594	0.245093	0.3341	0.313487	0.329574	0.193485	0.204512	0.220399
KLHDC10	0.0688681	0.0631904	0.158025	0.126171	0.0732919	0.0601024	0.0152653	0.0754921
C7orf25	0.0574661	0.0693254	0.0810385	0.0799085	0.0776032	0.0433895	0.0463803	0.0499016
C7orf43	0.465202	0.444787	0.67041	0.753793	0.382268	0.559242	0.978735	1.13238
PPIB	0.377635	0.380369	0.7846	0.779674	0.448374	0.449965	0.387112	0.355069
POLR2A	0.00784458	0.0119326	0.0101298	0.00986725	0.0111614	0.00784224	0.00839959	0.00956446
EIF5A	0.102162	0.128835	0.205175	0.169199	0.145147	0.205377	0.143158	0.18937
PAK4	0.157804	0.122086	0.135187	0.156258	0.0637113	0.178058	0.315532	0.316683
APP	0.0404087	0.0524541	0.0629891	0.0530567	0.0536516	0.056567	0.0344748	0.0314764
LY6E	0.100794	0.178835	0.101298	0.155288	0.169098	0.248766	0.0912999	0.0617372
F11R	7.02364	6.04296	3.90458	3.84984	8.14354	5.8174	5.73363	5.59793
PRPF4B	0.0171486	0.0255829	0.0519383	0.0520861	0.0400471	0.0237517	0.01826	0.0206963
STOML2	0.193834	0.226381	0.223224	0.215138	0.396159	0.291834	0.259292	0.302928
POSTN	0.00084831	0.00141718	0.00127452	0.00160788	0.00187302	0.00103171	0.000792483	0.00117397
PSMC1	2.69087	2.53375	3.08683	2.89547	2.74006	2.15662	2.55274	2.20079
STEAP4	0.353918	0.251534	0.233907	0.17761	0.327658	0.273836	0.334888	0.371063
DIP2C	0.00647634	0.00797548	0.0167971	0.0115819	0.004158	0.00639593	0.00606231	0.00521407
ZNF839	0.102162	0.102454	0.13224	0.106113	0.125985	0.0864575	0.0975083	0.0950049
THAP11	0.0985134	0.118405	0.13224	0.13523	0.137003	0.10542	0.104812	0.0978838
DNA2	0.00729729	0.0141411	0.0138871	0.0111613	0.0148979	0.0147203	0.010116	0.01078
MFAP2	0.0341604	0.0512271	0.127083	0.133936	0.0790403	0.0469249	0.0690227	0.0902067
HDGF	1.67382	1.8681	2.60428	2.86636	2.25145	3.0694	2.29711	2.9877
HSPA4	1.93834	1.67792	1.35187	1.30377	1.9305	1.55881	1.69453	1.38509
ITM2C	0.0233057	0.0271473	0.016134	0.0113231	0.0142273	0.0206341	0.0292525	0.0309965
FAM115A	0.00725168	0.00944788	0.00976146	0.0138465	0.00924532	0.0107992	0.00701183	0.00642962
IGFBP4	0.00283226	0.00371167	0.00246799	0.00196698	0.00273048	0.00482105	0.00430935	0.00492618
TPP1	0.355287	0.263191	0.545168	0.504686	0.225145	0.29762	0.349131	0.348671
H2AFX	0.971451	0.904911	1.11612	1.22613	1.17363	0.880645	0.898391	0.78371
CYP3A4	0.000898478	0.00145706	0.00130398	0.00161111	0.00197361	0.00107027	0.00138411	0.00118676
RPS6KA1	1.2679	0.972396	0.92826	0.886435	1.33171	0.835649	1.02986	0.962844
NOTCH3	0.0157348	0.0177608	0.00998248	0.012326	0.0199756	0.0253266	0.0251257	0.0252707
THSD7A	0.00197027	0.00325154	0.00449396	0.00313811	0.00210295	0.00147524	0.000872827	0.00143307
PTGES	0.000884796	0.00184663	0.0033852	0.00192816	0.00195445	0.00232375	0.000829003	0.00117077
TRIP6	0.0633952	0.0825156	0.169813	0.147847	0.0876629	0.0758512	0.0587971	0.0636565
NDUFB2	5.74661	4.93867	5.30434	5.75859	6.51484	5.27102	6.24491	5.66191
COX7A1	0.00533614	0.00938653	0.0106087	0.01527	0.0122153	0.00768154	0.00741355	0.00601378
DNMT1	0.0839188	0.0953991	0.133714	0.138789	0.100118	0.0568884	0.0803439	0.08125
TMEM168	0.0633952	0.0656444	0.0718296	0.0634092	0.0876629	0.0491747	0.0635447	0.0569389
TBL1X	0.79358	0.711659	2.16226	1.85375	0.799983	0.620309	0.843611	0.873277
IGHM	1.17213	1.24847	1.35924	1.13231	0.785612	1.11848	0.832655	0.815698
FLT1	0.00579222	0.00665646	0.00972463	0.00355868	0.00180595	0.00607452	0.00551451	0.00511811
TNFAIP6	0.529053	0.659511	0.795651	0.611446	1.20237	2.60658	1.32933	0.713336
MMP24	0.0123598	0.00911046	0.00500966	0.00514391	0.00259156	0.0212769	0.0241762	0.018905
ACHE	0.206604	0.203988	0.541485	0.679384	0.160955	0.282514	0.551451	0.70374
EFEMP2	0.0110371	0.0179755	0.0349202	0.0329987	0.0249576	0.0184807	0.0222407	0.0197367
FABP3	0.000989694	0.00417179	0.00155447	0.00201551	0.00239995	0.00356758	0.00314072	0.00225837
COX6A1	0.011402	0.00868101	0.00839854	0.00915551	0.00862258	0.0170987	0.0199034	0.0171137
INTS1	0.00547296	0.00828223	0.00208858	0.00275959	0.00463224	0.00736014	0.00544147	0.00345472
PLXNB2	0.460641	0.521474	0.729347	0.750558	0.541306	0.337474	0.360452	0.403051
ARPC1A	0.556418	0.555216	0.556219	0.482039	0.546096	0.56567	0.555103	0.527805
FECH	0.889357	1.63191	1.66129	1.36847	1.99277	4.43537	1.68357	2.45029
FBXL8	0.00820945	0.013681	0.0195598	0.00779674	0.011401	0.0145917	0.0210355	0.0115477
WASF2	0.15005	0.143865	0.130398	0.119378	0.146584	0.232696	0.376156	0.43184
HSPA9	0.264527	0.250921	0.401509	0.359103	0.291251	0.284121	0.344018	0.307086
TGFB1	0.445134	0.490799	1.85652	1.81169	0.526935	0.411396	0.471107	0.46063
CSNK2B	0.313783	0.284357	0.430978	0.384984	0.285024	0.300191	0.379808	0.326279
MMP14	0.0175591	0.0190491	0.00965095	0.00947903	0.00453164	0.0331046	0.0216198	0.0192889
ASCC2	0.439661	0.634971	0.699878	0.740852	0.977225	0.723158	0.580667	0.719734
SEPP1	0.0100338	0.0139878	0.0180863	0.019961	0.0222271	0.025423	0.0134393	0.010748
PSMC4	0.284138	0.28313	0.471497	0.456158	0.297958	0.23591	0.24651	0.230635
SLC29A1	0.321993	0.463192	0.703562	1.63699	0.352089	0.190592	0.263674	0.209842
STBD1	0.00761654	0.0146626	0.0128188	0.0126171	0.0103471	0.00466035	0.00555103	0.00505413
SIN3B	0.155067	0.143865	0.153237	0.178905	0.172931	0.116669	0.142793	0.120595
QTRT1	0.019429	0.0252148	0.0181232	0.015367	0.0127423	0.0161023	0.0196843	0.0185212
FAM45B	0.225304	0.2727	0.256376	0.255254	0.337239	0.227554	0.208164	0.226156
NID2	0.0152331	0.0269019	0.0343309	0.0456158	0.0334364	0.0273836	0.0147541	0.0195448
SCRG1	0.00706925	0.017362	0.0121926	0.00960844	0.0153769	0.0158452	0.00777875	0.00735728
KIF5C	0.0364408	0.0392639	0.0578321	0.048851	0.0346819	0.0340688	0.0264404	0.0263583
RPL7	8.57431	7.20861	5.37801	7.69969	7.5208	8.9993	6.42751	10.5561
TBC1D30	0.00186537	0.00155522	0.00272584	0.00277901	0.00295563	0.00110884	0.000996995	0.00208883
AGPAT2	0.0320625	0.0349694	0.0497282	0.0459393	0.0424901	0.0211162	0.0199034	0.0214001
FHOD3	0.000930404	0.00355829	0.0013445	0.00162082	0.00205984	0.00456393	0.000839959	0.00119636
TIMP4	0.000916722	0.00148773	0.00133345	0.00162082	0.00202152	0.00109599	0.000829003	0.00119636
HLA-DRA	3.66689	3.58897	6.04106	6.50268	3.1185	2.37196	3.00559	2.25197
TPI1	1.50963	1.30675	3.66147	3.52633	1.34608	1.18598	1.48271	1.31152
